# Supplementary material for: Symbiodinium genomes reveal adaptive evolution of functions related to coral-dinoflagellate symbiosis
Source: PubMed Central journal article supplement (PMC6123633; doi:10.1038/s42003-018-0098-3), 2018-07-17
Supplement: 42003_2018_98_MOESM1_ESM.pdf [file 42003_2018_98_MOESM1_ESM.pdf]

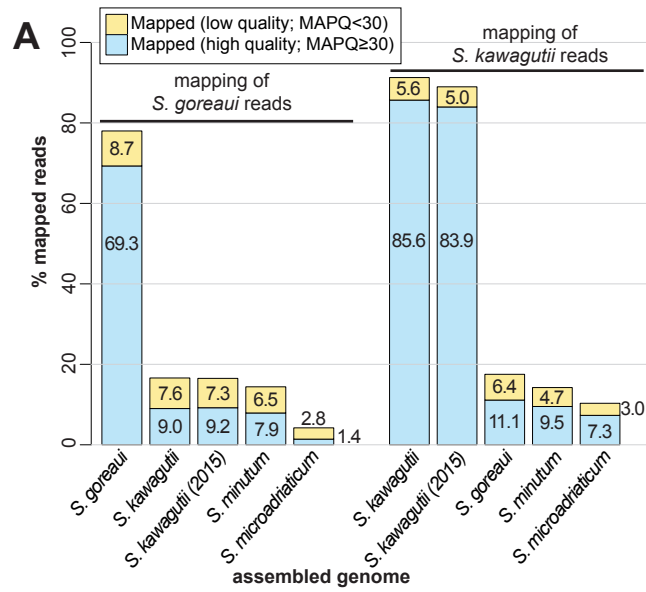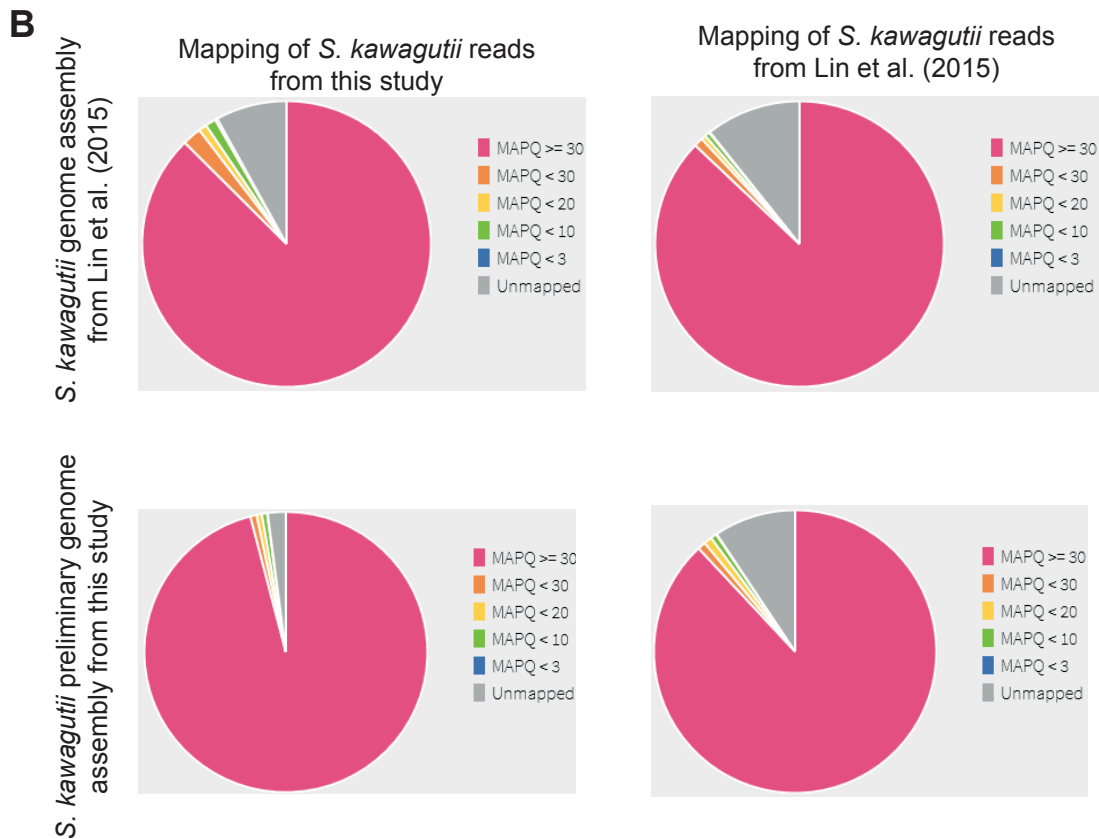

**Supplementary Figure 1.** (A) Mapping of sequence reads from *S. goreaui* and *S. kawagutii* to five assembled *Symbiodinium* genomes: *S. goreaui* and *S. kawagutii* from this study, *S. kawagutii* (Lin et al. 2015), *S. minutum* (Shoguchi et al. 2013), and *S. microadriaticum* (Aranda et al. 2016). (B) Mapping of *S. kawagutii* sequence reads from this study (left) and from Lin et al. (2015; right) onto the assembled genome from Lin et al. (2015; above), and the preliminary genome assembly from this study (bottom). Mapping at various thresholds of mapping quality (MAPQ) are shown.

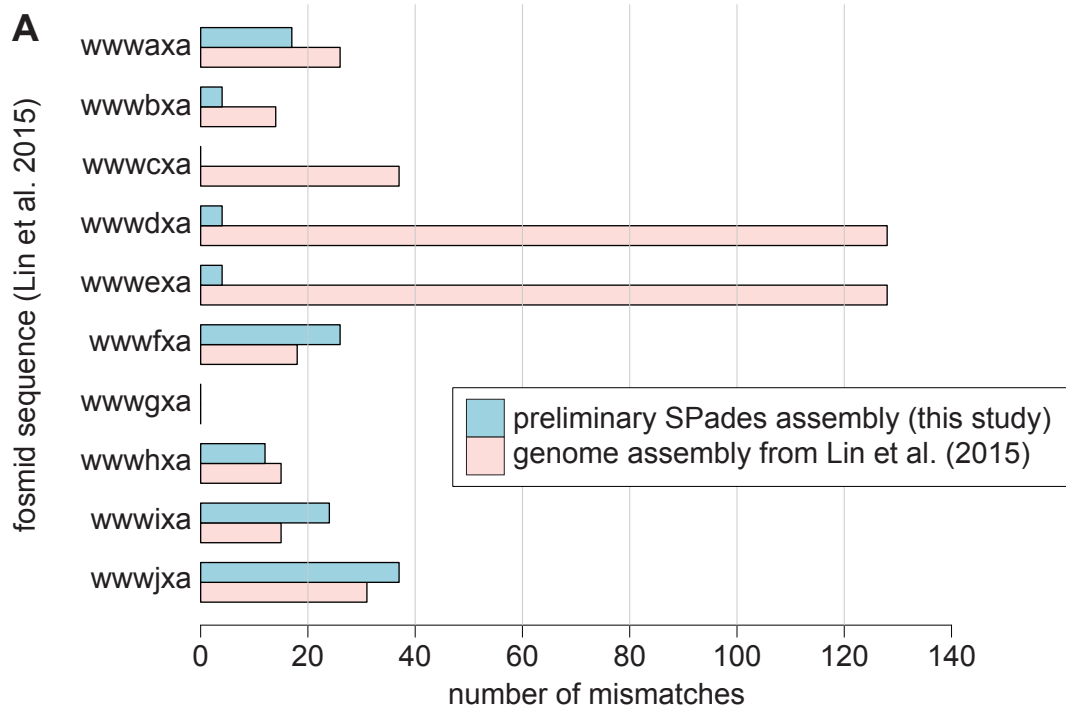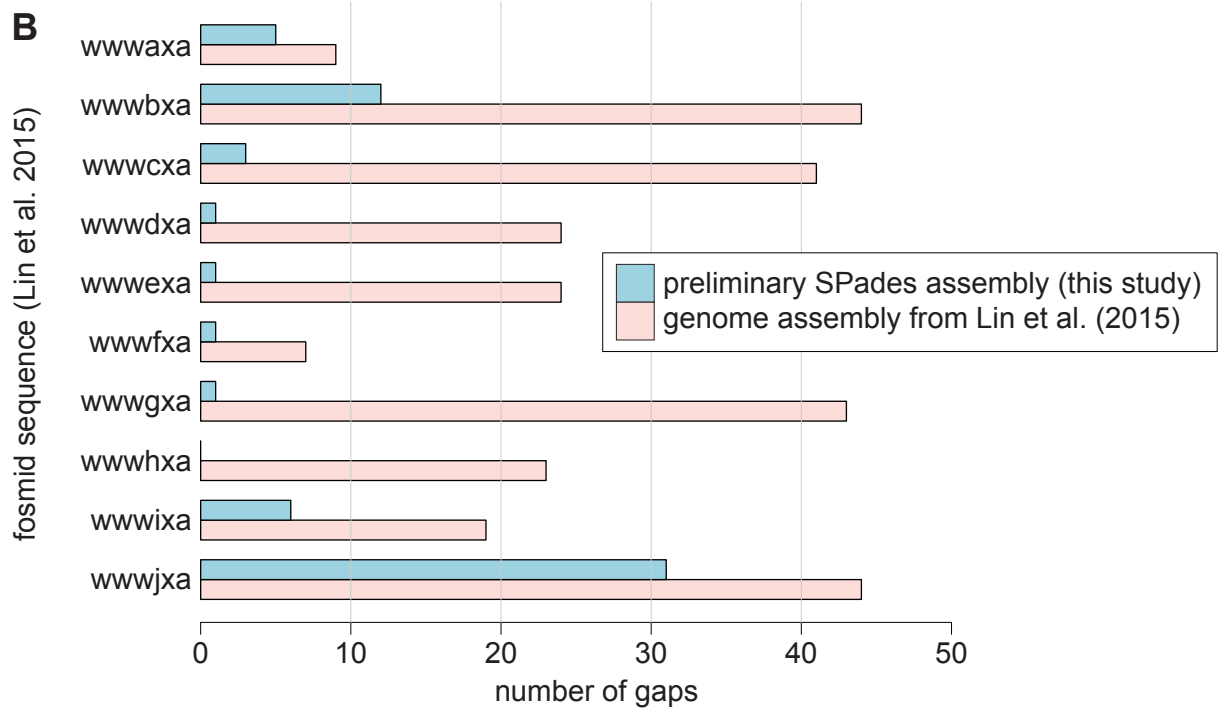

**Supplementary Figure 2.** Mapping of ten *S. kawagutii* fosmid sequences from Lin et al. (2015) onto the assembled genome from Lin et al. (2015) and the preliminary SPAdes genome assembly from this study, based on observed (A) number of mismatches and (B) number of gaps in the aligned regions.

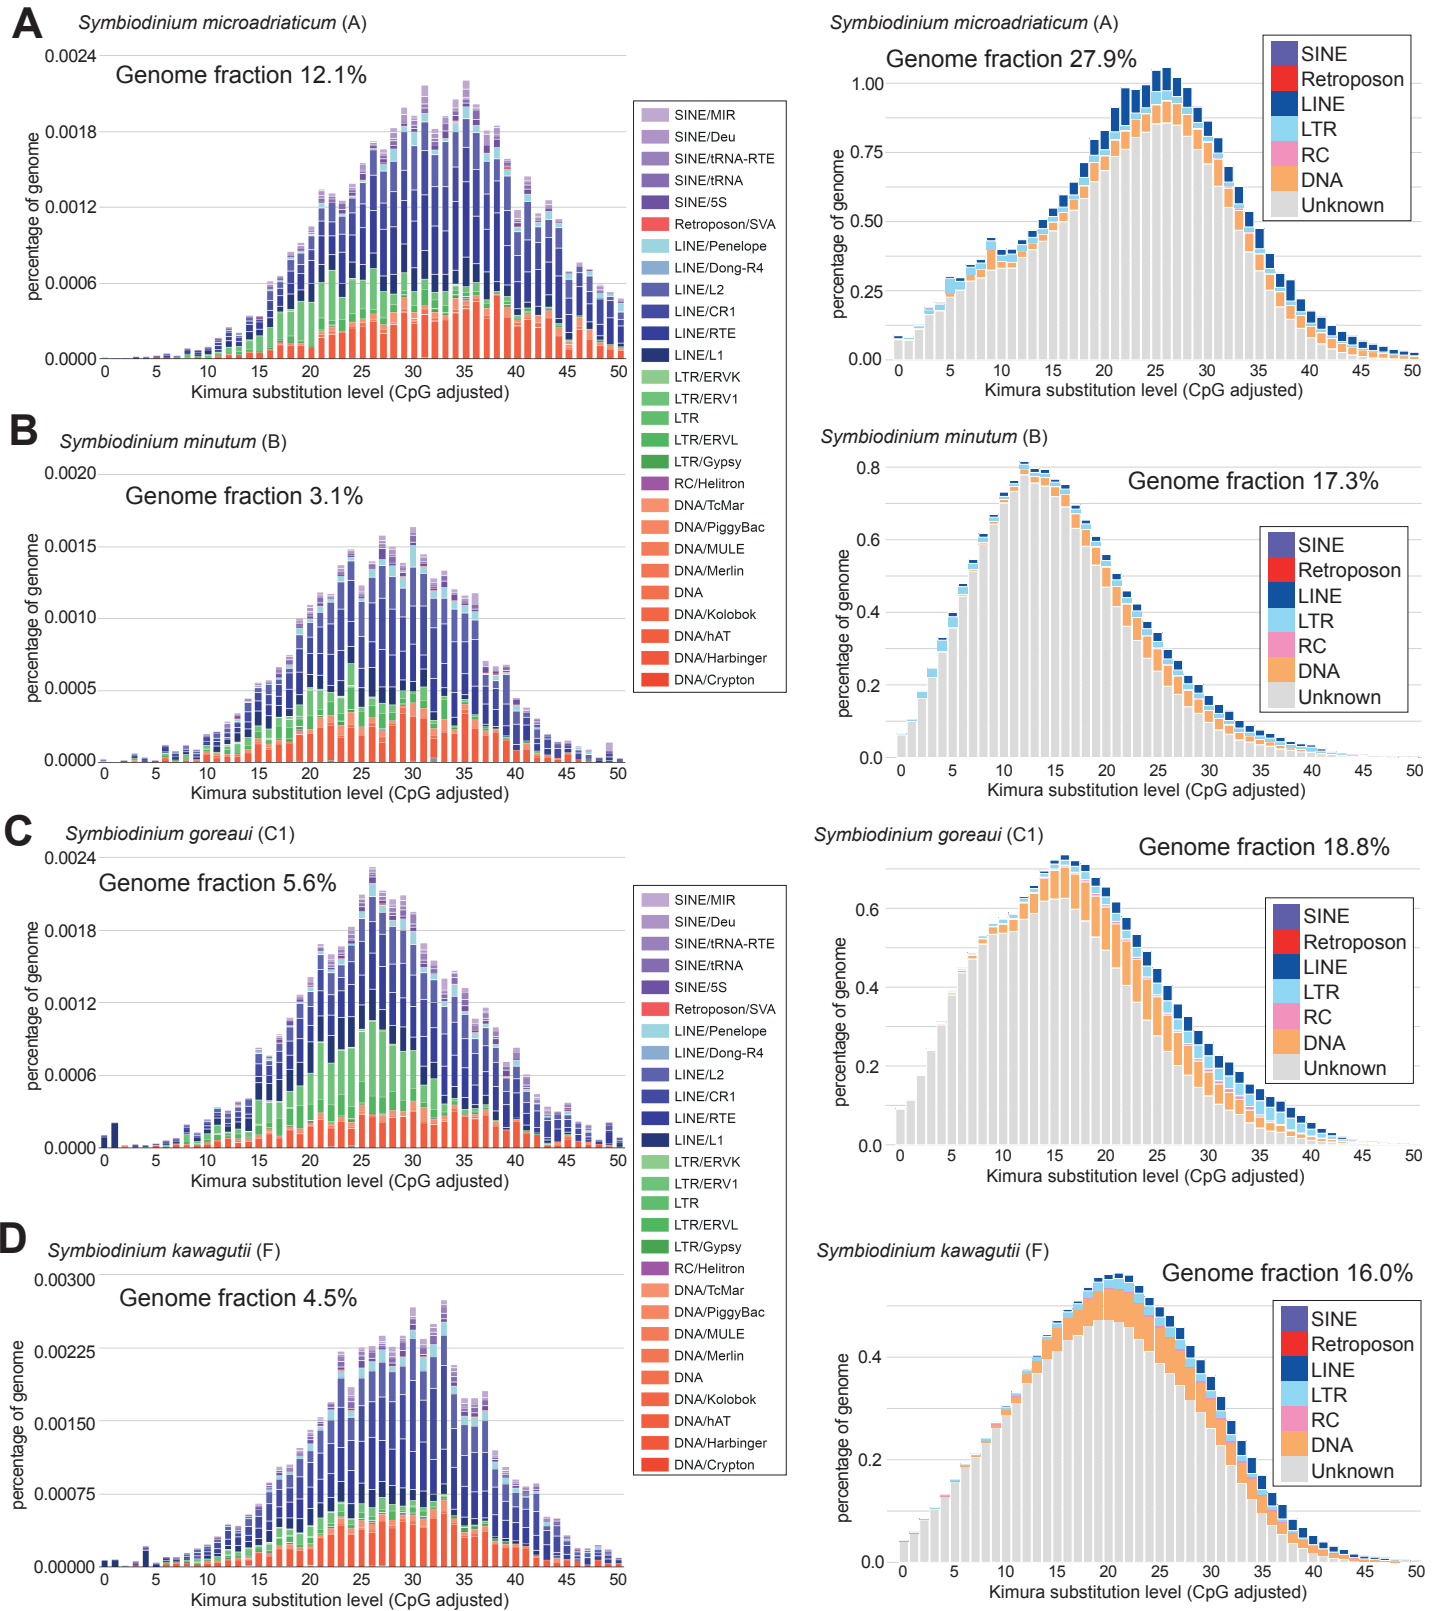

**Supplementary Figure 3.** Interspersed repeat landscape for each genome of (A) *S. microadriaticum*, (B) *S. minutum*, (C) *S. goreau* and (D) *S. kawagutii*, shown for only known repetitive elements on the left, and for all repetitive elements (including unknown repeats) on the right.

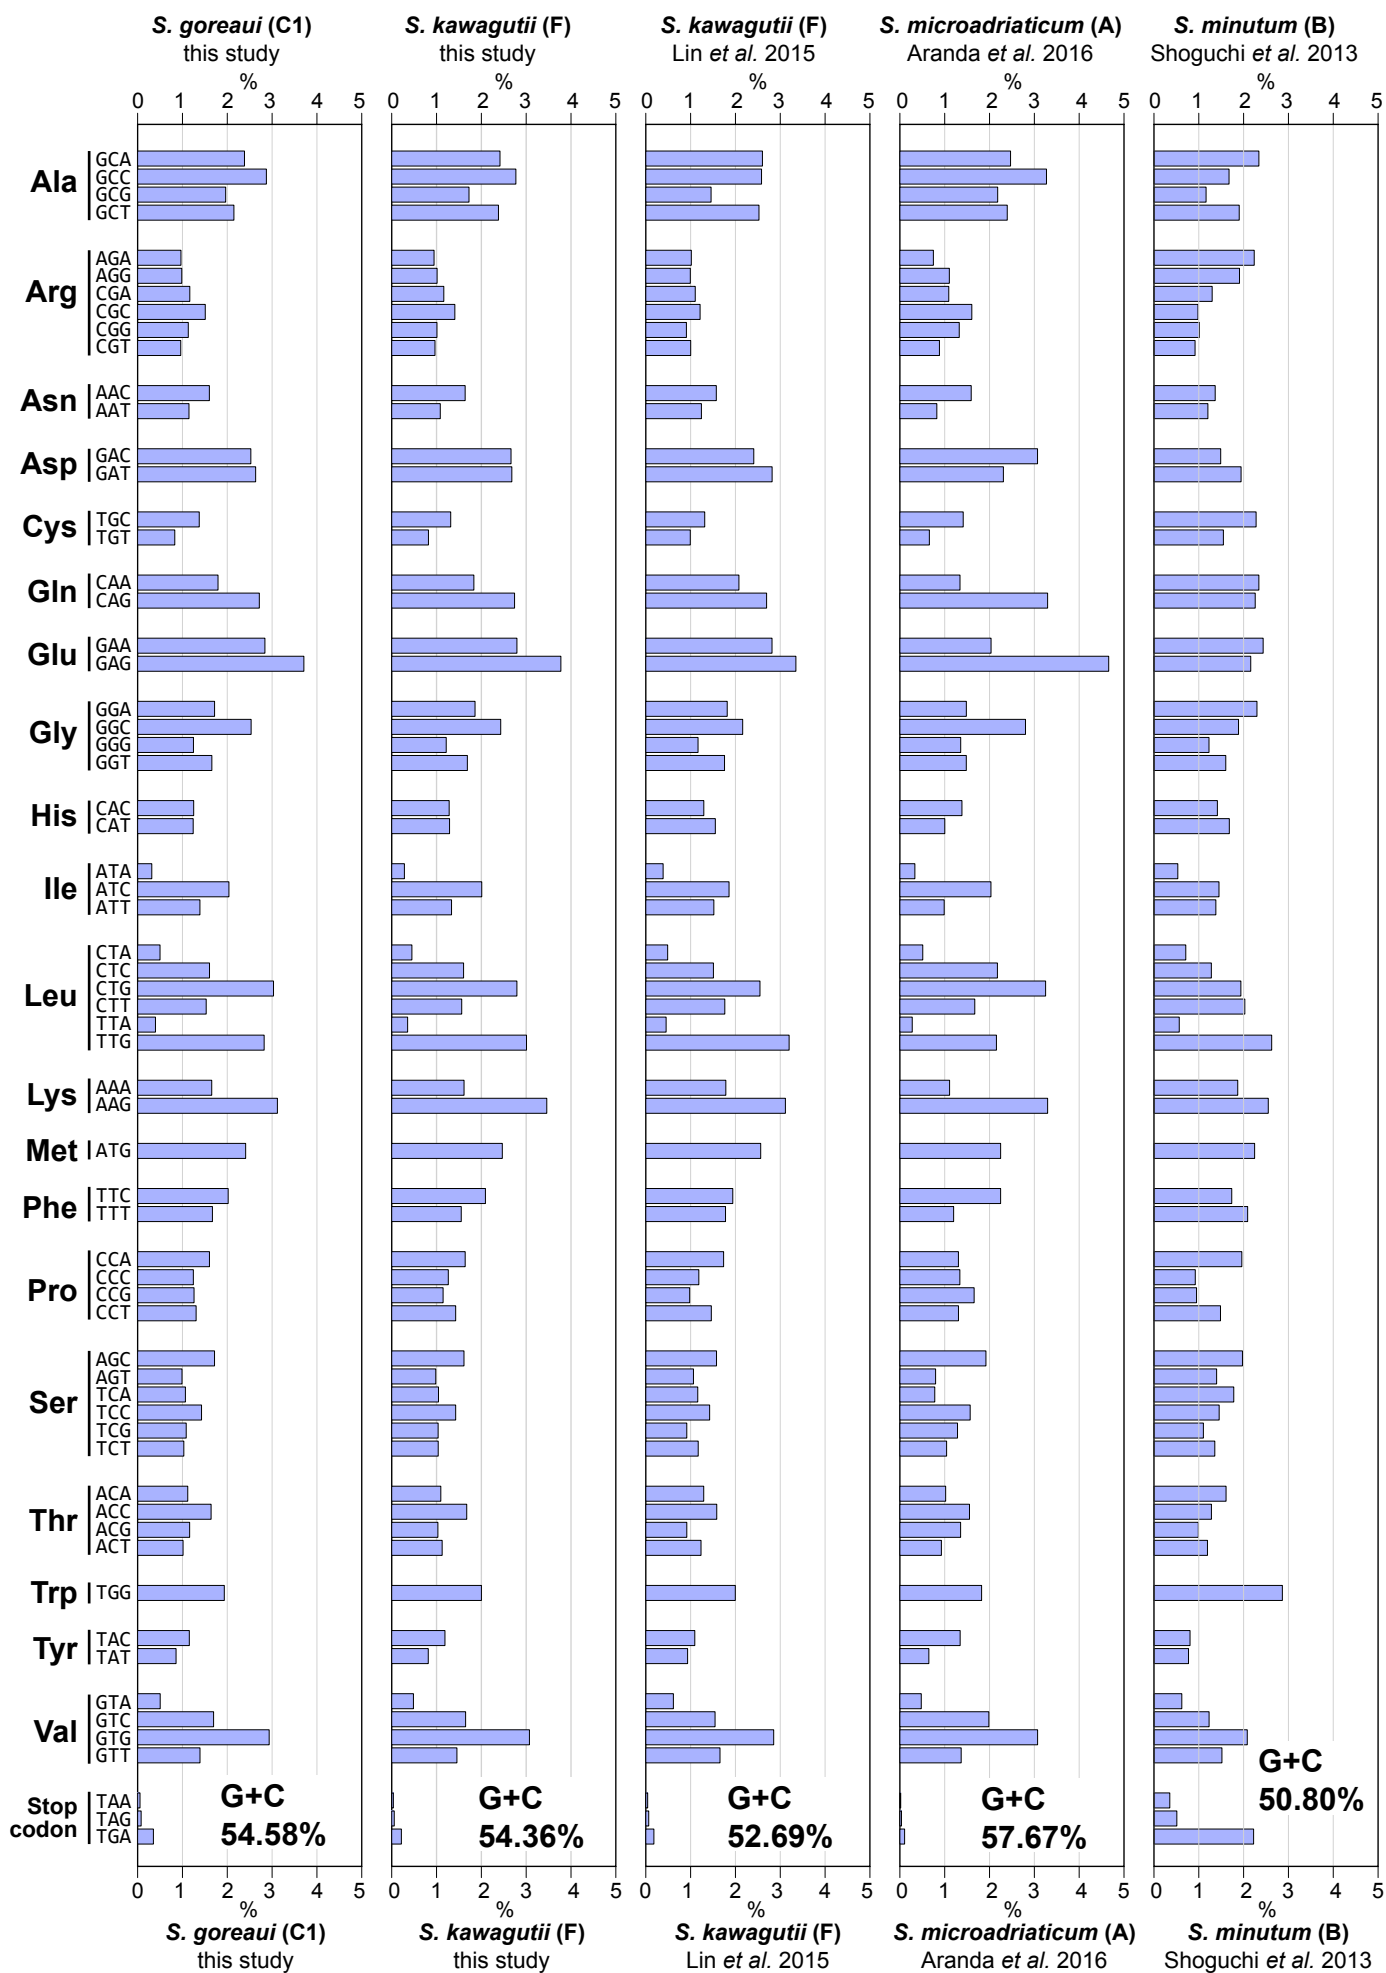

**Supplementary Figure 4.** Codon usage profiles based on predicted gene models in *S. goreau* (this study), *S. kawagutii* (this study), *S. kawagutii* (Lin et al., 2015), *S. microadriaticum* and *S. minutum*.

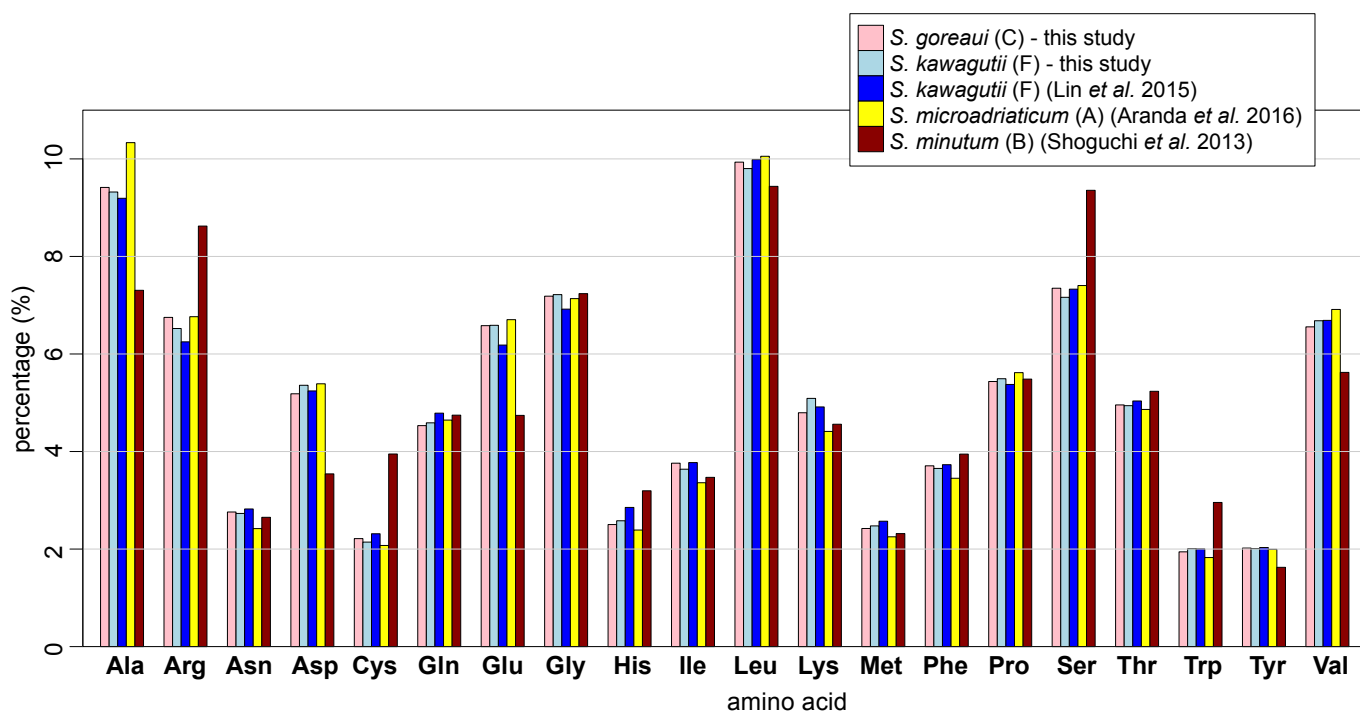

**Supplementary Figure 5.** Amino acid profiles based on predicted gene models in *S. goreau* (this study), *S. kawagutii* (this study), *S. kawagutii* (Lin *et al.*, 2015), *S. microadriaticum* and *S. minutum*.

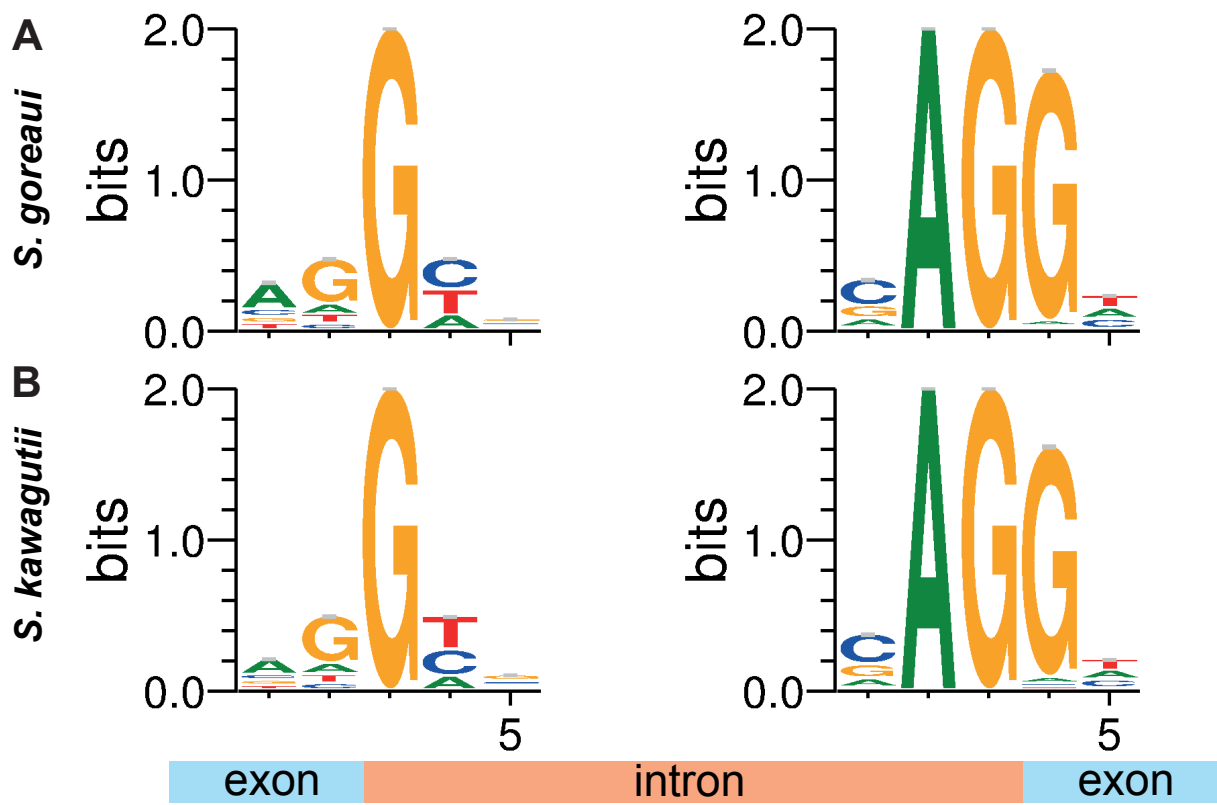

**Supplementary Figure 6.** Non-canonical splice sites in the genomes of *S. goreau* (A) and *S. kawagutii* (B), shown for the donor (left) and the acceptor (right).

**A** Recovery of 458 CEGMA proteins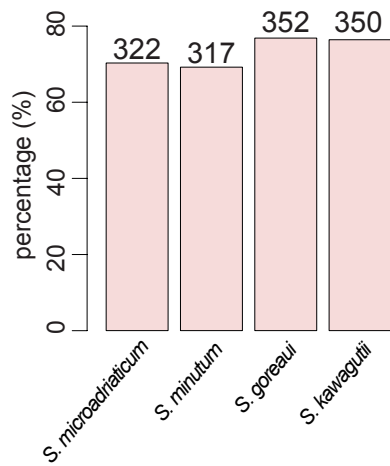**B** Recovery of 429 BUSCO proteins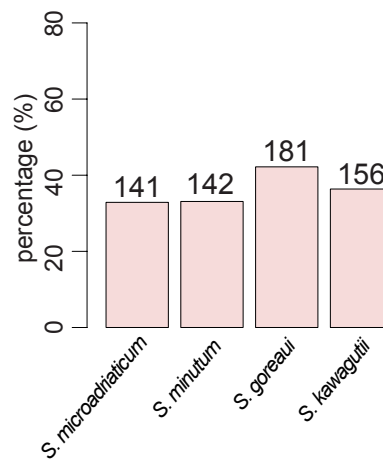**C**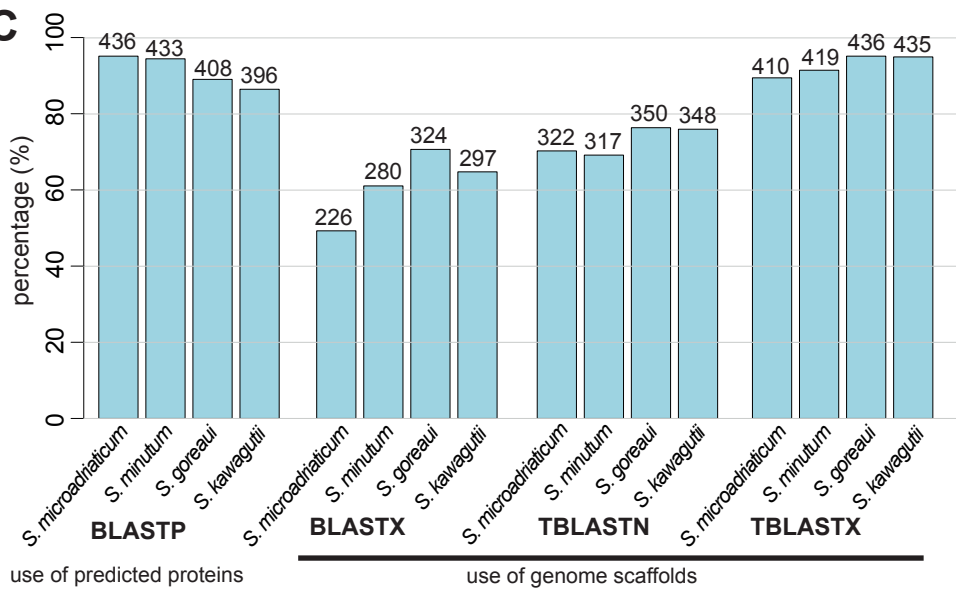**D** CEGMA genes in the four *Symbiodinium* genomes based on TBLASTX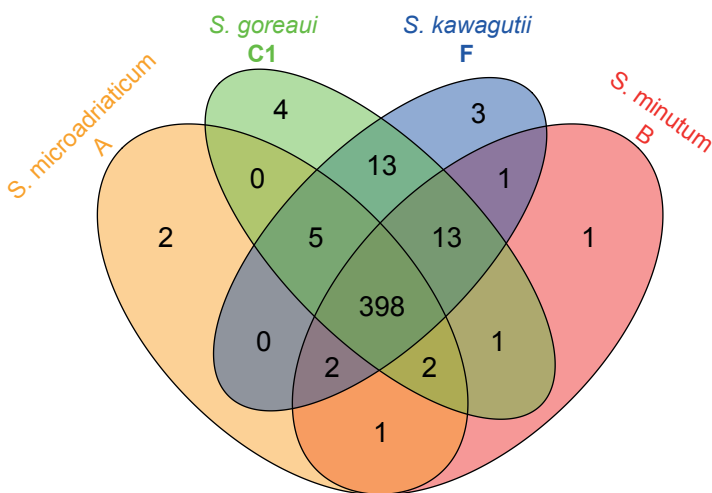**E** Homologous protein sets shared among the four *Symbiodinium* genomes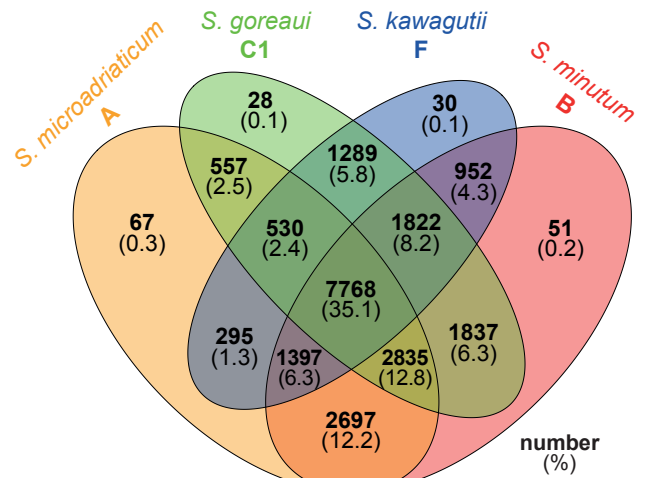

**Supplementary Figure 7.** Recovery of (A) CEGMA and (B) BUSCO genes in *Symbiodinium* using the default programs, and the recovery of CEGMA genes based on (C) a suite of BLAST analyses using the predicted proteins of *Symbiodinium* and their genome scaffolds. (D) The overlapping CEGMA genes in each genome based on TBLASTX analysis. (E) Number and percentage of homologous protein sets shared among the four *Symbiodinium* genomes.

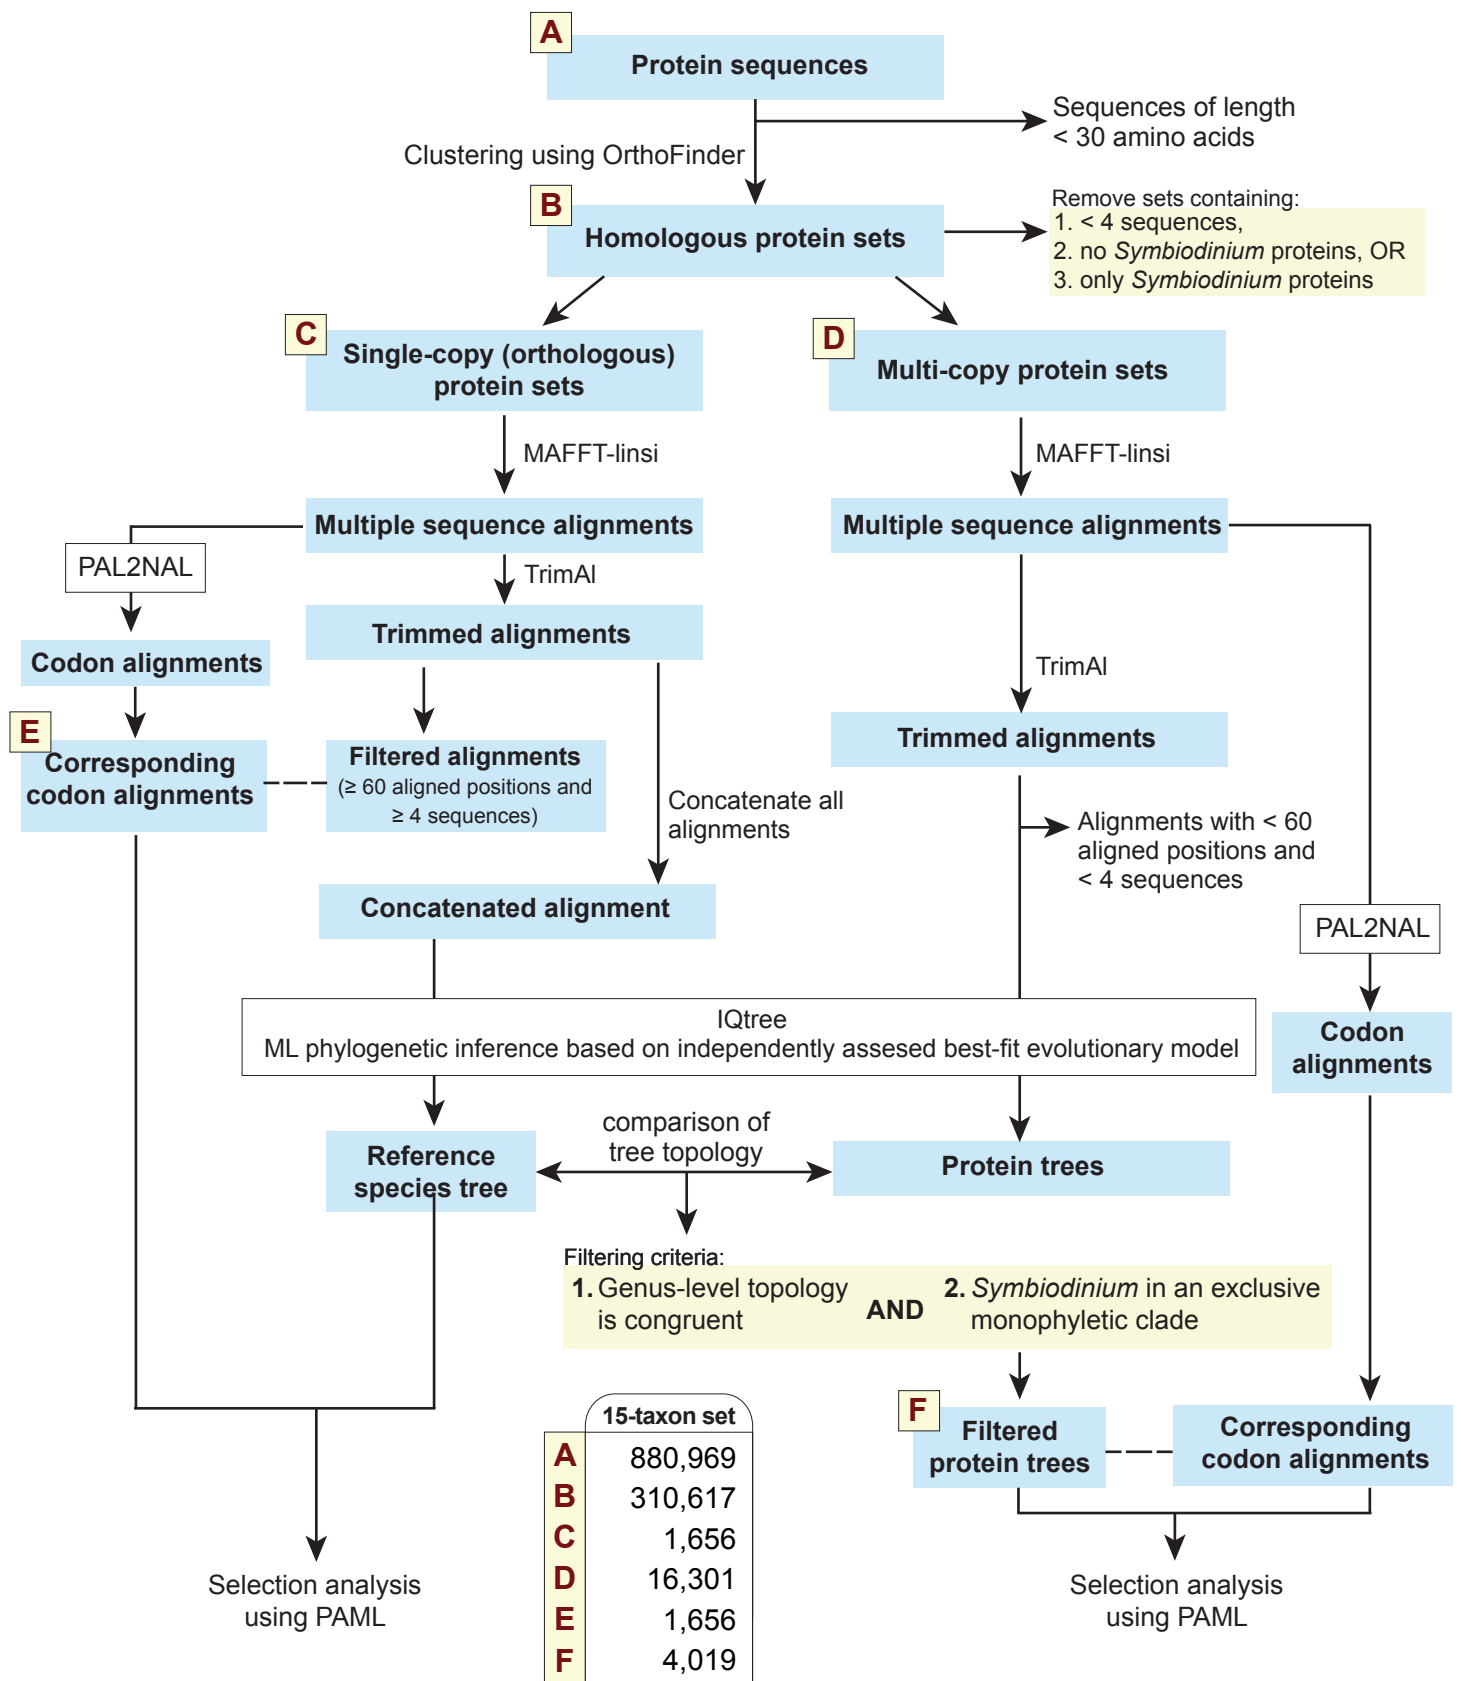

**Supplementary Figure 8.** Schematic workflow for analysis of positive selection in this study, with number of items at the six designated stages (A, B, C, D, E and F) shown for the analyses using the 15-taxon set.



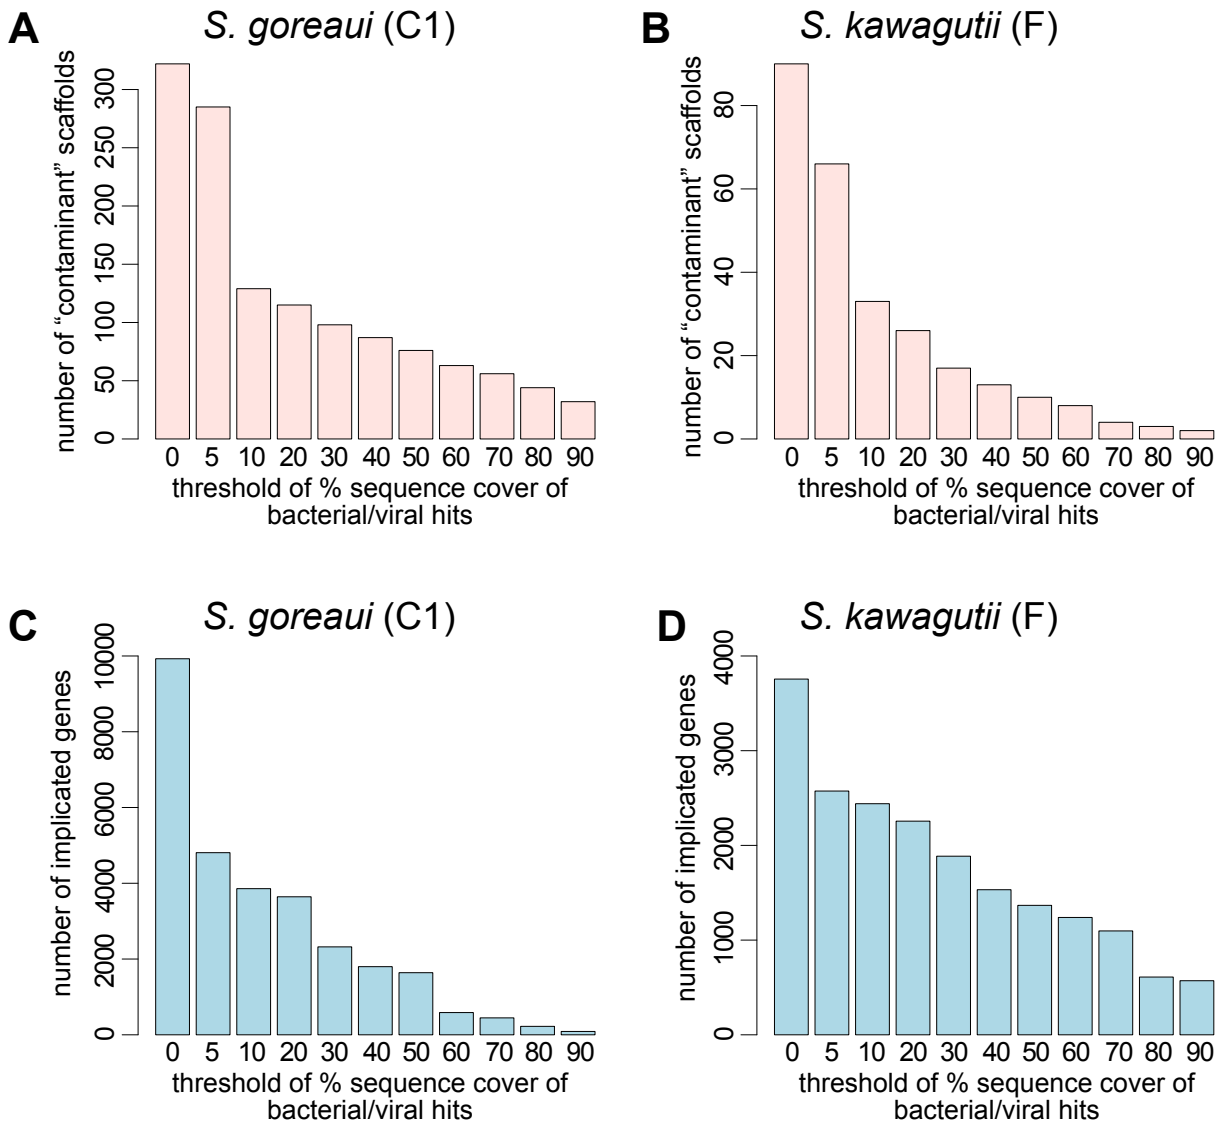

**Supplementary Figure 9.** Number of “contaminated” genome scaffolds that contain regions with hits to bacterial or viral genomes, shown at different threshold of percentage sequence cover in the scaffolds for (A) *S. goreau* and (B) *S. kawagutii*. The implicated gene models in the corresponding scaffolds in *S. goreau* and *S. kawagutii* are shown in (C) and (D) respectively.

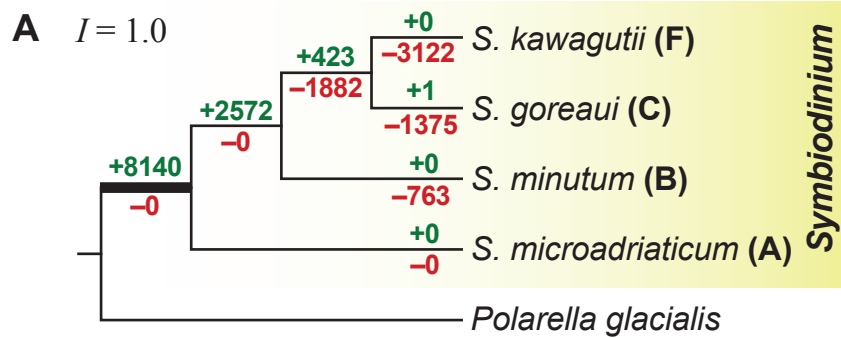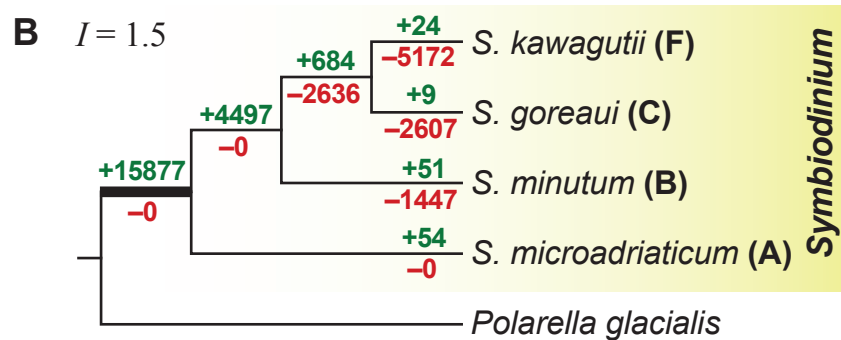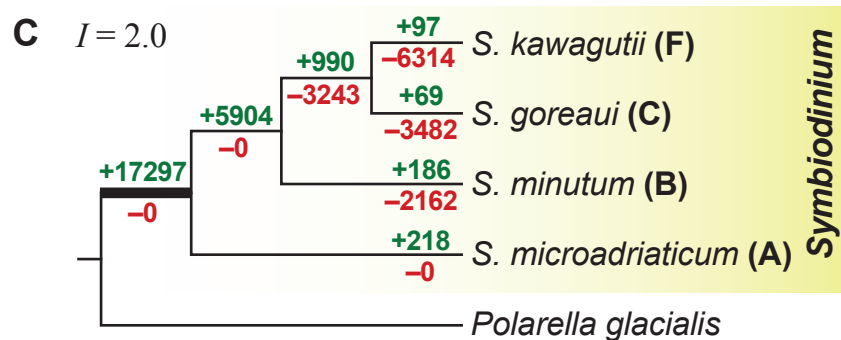

**Supplementary Figure 10.** Analysis of gene gain and gene loss in distinct *Symbiodinium* lineages based on clustering of gene families using inflation parameter  $I$  at (A) 1.0, (B) 1.5 and (C) 2.0.

**Supplementary Table 1.** New genome sequencing data generated in this study.

| <b><i>Symbiodinium goreau</i> SCF055-01 (clade C)</b>            |                     |                              |                          |                          |                               |
|------------------------------------------------------------------|---------------------|------------------------------|--------------------------|--------------------------|-------------------------------|
| Library                                                          | Insert size (bases) | Number of raw 150-base reads | Total bases of raw reads | Number of filtered reads | Total bases of filtered reads |
| Paired-end-230-read1                                             | 230                 | 114,097,328                  | 17,114,599,200           | 112,131,983              | 16,673,830,321                |
| Paired-end-230-read2                                             | 230                 | 114,097,328                  | 17,114,599,200           | 111,484,222              | 16,460,439,867                |
| Paired-end-500-read1                                             | 500                 | 143,659,886                  | 21,548,982,900           | 143,659,886              | 21,025,889,473                |
| Paired-end-500-read2                                             | 500                 | 143,659,886                  | 21,548,982,900           | 143,659,886              | 19,917,972,952                |
| Mate-pair-3k-read1                                               | 3000                | 51,818,233                   | 7,772,734,950            | 19,716,458               | 2,338,880,924                 |
| Mate-pair-3k-read2                                               | 3000                | 51,818,233                   | 7,772,734,950            | 19,267,699               | 2,273,478,043                 |
| Mate-pair-6k-read1                                               | 6000                | 46,780,528                   | 7,017,079,200            | 18,079,228               | 2,139,909,539                 |
| Mate-pair-6k-read2                                               | 6000                | 46,780,528                   | 7,017,079,200            | 17,651,099               | 2,079,770,820                 |
| Mate-pair-9k-read1                                               | 9000                | 30,718,808                   | 4,607,821,200            | 10,903,776               | 1,303,946,153                 |
| Mate-pair-9k-read2                                               | 9000                | 30,718,808                   | 4,607,821,200            | 10,655,510               | 1,269,966,863                 |
| Single-end (after filtering)                                     | n/a                 | n/a                          | n/a                      | 78,528,939               | 5,183,436,887                 |
| <b>TOTAL</b>                                                     |                     | <b>774,149,566</b>           | <b>116,122,434,900</b>   | <b>685,738,686</b>       | <b>90,667,521,842</b>         |
| <b><i>Symbiodinium kawagutii</i> CS-156 (=CCMP2468; clade F)</b> |                     |                              |                          |                          |                               |
| Paired-end-230-read1                                             | 230                 | 175,549,642                  | 26,332,446,300           | 171,450,581              | 25,504,756,026                |
| Paired-end-230-read2                                             | 230                 | 175,549,642                  | 26,332,446,300           | 171,450,581              | 25,153,088,954                |
| Mate-pair-4k-read1                                               | 4000                | 51,491,804                   | 7,723,770,600            | 19,529,439               | 2,335,641,250                 |
| Mate-pair-4k-read2                                               | 4000                | 51,491,804                   | 7,723,770,600            | 19,529,439               | 2,326,433,751                 |
| Mate-pair-6k-read1                                               | 6000                | 52,197,110                   | 7,829,566,500            | 19,803,840               | 2,368,759,747                 |
| Mate-pair-6k-read2                                               | 6000                | 52,197,110                   | 7,829,566,500            | 19,803,840               | 2,357,239,118                 |
| Mate-pair-9k-read1                                               | 9000                | 28,050,295                   | 4,207,544,250            | 10,846,597               | 1,288,094,198                 |
| Mate-pair-9k-read2                                               | 9000                | 28,050,295                   | 4,207,544,250            | 10,846,597               | 1,282,668,909                 |
| Single-end (after filtering)                                     | n/a                 | n/a                          | n/a                      | 178,881,831              | 2,347,886,305                 |
| <b>TOTAL</b>                                                     |                     | <b>614,577,702</b>           | <b>92,186,655,300</b>    | <b>622,142,745</b>       | <b>64,964,568,258</b>         |

**Supplementary Table 2.** Statistics of genome assembly.

|                               | <i>Symbiodinium goreau</i><br>SCF055-01 (clade C, type C1) | <i>Symbiodinium kawagutii</i><br>CS-156 (=CCMP2468, clade F) |
|-------------------------------|------------------------------------------------------------|--------------------------------------------------------------|
| %G+C                          | 44.83                                                      | 45.72                                                        |
| Total number of scaffolds     | 41,289                                                     | 16,959                                                       |
| Total assembled bases (bp)    | 1,027,792,016                                              | 1,048,482,934                                                |
| N50 length of scaffolds (bp)  | 98,034                                                     | 268,823                                                      |
| Maximum scaffold length (bp)  | 8,337,000                                                  | 5,159,000                                                    |
| Total number of contigs       | 267,890                                                    | 109,980                                                      |
| N50 length of contigs (bp)    | 6,576                                                      | 35,743                                                       |
| Maximum contig length (bp)    | 3,449,000                                                  | 956,496                                                      |
| Number of scaffolds > 50 Kb   | 6,160                                                      | 4,204                                                        |
| % genome in scaffolds > 50 Kb | 72.87                                                      | 88.91                                                        |
| % gap                         | 13.22                                                      | 15.24                                                        |
| Estimated genome size (bp)    | 1,189,354,686                                              | 1,072,636,679                                                |

**Supplementary Table 3.** Estimation of genome size for *S. goreau* and *S. kawagutii* based on *k*-mer coverage.

| <b>Estimate of genome size (bp)</b> |                                                                    |                                                                      |
|-------------------------------------|--------------------------------------------------------------------|----------------------------------------------------------------------|
| <b><i>k</i></b>                     | <b><i>Symbiodinium goreau</i><br/>SCF055-01 (clade C, type C1)</b> | <b><i>Symbiodinium kawagutii</i><br/>CS-156 (=CCMP2468, clade F)</b> |
| 17                                  | 1,155,783,960                                                      | 1,060,560,949                                                        |
| 19                                  | 1,176,285,240                                                      | 1,075,387,053                                                        |
| 21                                  | 1,194,377,556                                                      | 1,057,483,567                                                        |
| 23                                  | 1,210,721,782                                                      | 1,069,035,022                                                        |
| 25                                  | 1,192,813,515                                                      | 1,080,674,525                                                        |
| 27                                  | 1,206,146,062                                                      | 1,092,678,958                                                        |
| Mean                                | 1,189,354,686                                                      | 1,072,636,679                                                        |

**Supplementary Table 4.** Putative plastid genome fragments in *S. goreau* and the encoded genes. Evidence of circularisation and number of core regions identified are shown.

| Sequence       | Encoded gene                   | Sequence length (bp) | Circular | Number of core regions identified |
|----------------|--------------------------------|----------------------|----------|-----------------------------------|
| SC1_Plastid_1  | <i>psbC/23S rRNA/psaA/atpB</i> | 10,928               | No       | 4                                 |
| SC1_Plastid_2  | <i>psbB/psbA</i>               | 4,954                | No       | 2                                 |
| SC1_Plastid_3  | <i>16S rRNA/petB</i>           | 4,255                | No       | 3                                 |
| SC1_Plastid_4  | <i>psaB</i>                    | 2,253                | No       | 1                                 |
| SC1_Plastid_5  | <i>atpA</i>                    | 2,048                | No       | 1                                 |
| SC1_Plastid_6  | <i>psbD</i>                    | 1,781                | No       | 1                                 |
| SC1_Plastid_7  | <i>petD</i>                    | 1,476                | No       | 1                                 |
| SC1_Plastid_8  | <i>psbE</i>                    | 1,006                | No       | 1                                 |
| SC1_Plastid_9  | <i>psbI</i>                    | 2,349                | No       | 1                                 |
| SC1_Plastid_10 | none ("empty")                 | 2,394                | No       | 1                                 |

**Supplementary Table 5.** Putative plastid genome fragments in *S. kawagutii* and the encoded genes. Evidence of circularisation and number of core regions identified are shown.

| <b>Sequence</b> | <b>Encoded gene</b> | <b>Sequence length (bp)</b> | <b>Circular</b> | <b>Number of core regions identified</b> |
|-----------------|---------------------|-----------------------------|-----------------|------------------------------------------|
| SF_Plastid_1    | <i>psaB</i>         | 11,097                      | No              | 1                                        |
| SF_Plastid_2    | <i>psbA/atpB</i>    | 6,627                       | No              | 3                                        |
| SF_Plastid_3    | <i>psaA</i>         | 7,802                       | Yes             | 2                                        |
| SF_Plastid_4    | <i>psbC</i>         | 4,497                       | No              | 2                                        |
| SF_Plastid_5    | <i>atpA</i>         | 4,489                       | Yes             | 0                                        |
| SF_Plastid_6    | <i>23S rRNA</i>     | 3,059                       | No              | 0                                        |
| SF_Plastid_7    | <i>psbB</i>         | 2,237                       | No              | 1                                        |
| SF_Plastid_8    | <i>psbD</i>         | 1,500                       | No              | 0                                        |
| SF_Plastid_9    | <i>petD</i>         | 1,290                       | No              | 0                                        |
| SF_Plastid_10   | <i>petB</i>         | 1,132                       | No              | 0                                        |
| SF_Plastid_11   | <i>16S rRNA</i>     | 1,070                       | No              | 0                                        |
| SF_Plastid_12   | <i>16S rRNA</i>     | 1,696                       | Yes             | 1                                        |
| SF_Plastid_13   | <i>psbI</i>         | 1,581                       | No              | 0                                        |
| SF_Plastid_14   | none ("Empty")      | 1,517                       | Yes             | 2                                        |
| SF_Plastid_15   | none ("Empty")      | 1,293                       | No              | 1                                        |

**Supplementary Table 6.** Length and GC content of the coding and non-coding regions identified in the plastid genome sequences in *Symbiodinium*.

|                           | <b><i>S. goreau</i> (clade C)</b> | <b><i>S. kawagutii</i> (clade F)</b> | <b><i>Symbiodinium</i> clade C3<br/>(Barbrook et al. 2014)</b> |
|---------------------------|-----------------------------------|--------------------------------------|----------------------------------------------------------------|
| Total Length (bp)         | 33,444                            | 50,887                               | 27,303                                                         |
| Total GC%                 | 41.35%                            | 38.88%                               | 41.84%                                                         |
| <b>Coding regions</b>     |                                   |                                      |                                                                |
| Total length (bp)         | 15,393                            | 23,753                               | 15,828                                                         |
| G+C (%)                   | 36.80                             | 35.46                                | 36.03                                                          |
| <b>Non-coding regions</b> |                                   |                                      |                                                                |
| Total length (bp)         | 18,051                            | 27,134                               | 11,475                                                         |
| G+C (%)                   | 45.64                             | 42.56                                | 48.22                                                          |



**Supplementary Table 7.** Core conserved regions identified in plastid genomes of *S. goreau* and *S. kawagutii*.

| <b>Species</b>      | <b>Core conserved region</b>                                                      | <b>Length (bp)</b> |
|---------------------|-----------------------------------------------------------------------------------|--------------------|
| <i>S. goreau</i>    | TAATGGGCTGGGTGCCCTACCCAGCCCATATGGGCCCACGCTTCG<br>CGGGGCCATAACGGCCCTTCGGGCCTTCAAAA | 79                 |
| <i>S. kawagutii</i> | GTGATTCCCAAGGACCGGAAGCCGGACCTTGGGAATCAGCG                                         | 41                 |

**Supplementary Table 8.** Statistics of predicted gene models in *Symbiodinium* genomes.

|                                                                   | <i>S. microadriaticum</i> | <i>S. minutum</i>    | <i>S. kawagutii</i> | <i>S. goreau</i> | <i>S. kawagutii</i> |
|-------------------------------------------------------------------|---------------------------|----------------------|---------------------|------------------|---------------------|
| <i>Symbiodinium</i> clade                                         | A                         | B                    | F                   | C                | F                   |
| Reference                                                         | Aranda et al. 2016        | Shoguchi et al. 2013 | Lin et al. 2015     | This study       | This study          |
| <b>Assembly</b>                                                   |                           |                      |                     |                  |                     |
| Total assembled bases (bp)                                        | 808,242,489               | 609,476,485          | 935,067,369         | 1,027,792,016    | 1,048,482,934       |
| G+C content (%)                                                   | 50.51                     | 43.46                | 43.97               | 44.83            | 45.72               |
| <b>Genes</b>                                                      |                           |                      |                     |                  |                     |
| Number of genes                                                   | 49,109                    | 47,014               | 36,850              | 35,913           | 26,609              |
| Mean length of genes (CDS+introns) (bp)                           | 12,898                    | *11,961              | 3,788               | 6,967            | 6,507               |
| Mean length of transcripts (CDS) (bp)                             | *2,377                    | *2,068               | 1,041               | 1,766            | 1,736               |
| Gene models supported by transcriptome (%)                        | 76.30                     | 77.20                | 72.82               | 67.02            | 64.40               |
| Gene Content (total gene length/ total assembled bases x 100) (%) | *78.37                    | *68.12               | 14.93               | 24.36            | 16.51               |
| G+C content of CDS (%)                                            | *57.67                    | *50.80               | *52.69              | 56.70            | 54.95               |
| <b>Exons</b>                                                      |                           |                      |                     |                  |                     |
| Number of exons per gene                                          | 21.8                      | *19.6                | 4.1                 | 10               | 8.7                 |
| Average length (bp)                                               | 109.5                     | *100.8               | 256                 | 175.9            | 199.5               |
| Total length (Mb)                                                 | 117.3                     | *83.0                | 38.4                | 63.4             | 46.2                |
| <b>Introns</b>                                                    |                           |                      |                     |                  |                     |
| Number of genes with introns (%)                                  | 98.2                      | *94.7                | 64.1                | 92.9             | 94                  |
| Average length (bp)                                               | 504.7                     | *500.4               | 893                 | 575.1            | 619.4               |
| Total length (Mb)                                                 | 516.1                     | *332.2               | 101.2               | 186.8            | 126.9               |
| <b>Intergenic regions</b>                                         |                           |                      |                     |                  |                     |
| Average length (bp)                                               | 3,633                     | *1,993               | 17,888              | 10,627           | 23,042              |

\*: values calculated in this study

**Supplementary Table 9.** Percentage of donor splice sites in *Symbiodinium* genomes.

| <i>Symbiodinium</i><br>genome          | Percentage of 5'-donor splice sites |                   |                       | G following<br>AG acceptor<br>sites | References<br>and/or remarks                                                                                                              |
|----------------------------------------|-------------------------------------|-------------------|-----------------------|-------------------------------------|-------------------------------------------------------------------------------------------------------------------------------------------|
|                                        | GA<br>(non-canonical)               | GC<br>(canonical) | GT<br>(non-canonical) |                                     |                                                                                                                                           |
| <i>S. microadriaticum</i><br>(clade A) | 21.9                                | 52.1              | 26.0                  | 96.2                                | Aranda et al. 2016                                                                                                                        |
| <i>S. minutum</i><br>(clade B)         | 15.3                                | 35.9              | 47.0                  | 93.7                                | Shoguchi et al.<br>2013; numbers from<br>Aranda et al. 2016                                                                               |
| <i>S. kawagutii</i><br>(clade F)       | 2.3                                 | 23.2              | 65.6                  | 86.4                                | Lin et al. 2015;<br>numbers from<br>Aranda et al. 2016.<br>No splice sites were<br>specified in gene<br>prediction in Lin et<br>al. 2015. |
| <i>S. goreau</i><br>(clade C)          | 20.6                                | 43.0              | 36.3                  | 95.5                                | <b>This study</b>                                                                                                                         |
| <i>S. kawagutii</i><br>(clade F)       | 19.4                                | 36.3              | 44.3                  | 94.4                                | <b>This study</b>                                                                                                                         |

**Supplementary Table 10.** Syntenic collinear blocks between each possible pair of four *Symbiodinium* genomes. Each genome is identified by the clade: *S. microadriaticum* (A), *S. minutum* (B), *S. goreau* (C) and *S. kawagutii* (F).

| Number of genes in a block | Number of identified collinear blocks in each genome-pair |           |            |            |            |            | Number of genes implicated in collinear blocks in each genome-pair |            |            |             |             |             |
|----------------------------|-----------------------------------------------------------|-----------|------------|------------|------------|------------|--------------------------------------------------------------------|------------|------------|-------------|-------------|-------------|
|                            | A-B                                                       | A-C       | A-F        | B-C        | B-F        | C-F        | A-B                                                                | A-C        | A-F        | B-C         | B-F         | C-F         |
| 5                          | 1                                                         | 2         | 0          | 4          | 1          | 2          | 5                                                                  | 10         | 0          | 20          | 5           | 10          |
| 6                          | 152                                                       | 42        | 52         | 58         | 65         | 99         | 912                                                                | 252        | 312        | 348         | 390         | 594         |
| 7                          | 77                                                        | 24        | 30         | 47         | 36         | 220        | 539                                                                | 168        | 210        | 329         | 252         | 1540        |
| 8                          | 51                                                        | 11        | 18         | 22         | 26         | 154        | 408                                                                | 88         | 144        | 176         | 208         | 1232        |
| 9                          | 32                                                        | 4         | 8          | 9          | 17         | 110        | 288                                                                | 36         | 72         | 81          | 153         | 990         |
| 10                         | 23                                                        | 1         | 3          | 7          | 13         | 73         | 230                                                                | 10         | 30         | 70          | 130         | 730         |
| 11                         | 11                                                        | 0         | 2          | 2          | 9          | 64         | 121                                                                | 0          | 22         | 22          | 99          | 704         |
| 12                         | 7                                                         | 2         | 4          | 3          | 2          | 33         | 84                                                                 | 24         | 48         | 36          | 24          | 396         |
| 13                         | 7                                                         | 0         | 2          | 1          | 0          | 25         | 91                                                                 | 0          | 26         | 13          | 0           | 325         |
| 14                         | 2                                                         | 0         | 1          | 0          | 1          | 30         | 28                                                                 | 0          | 14         | 0           | 14          | 420         |
| 15                         | 4                                                         | 0         | 1          | 2          | 1          | 17         | 60                                                                 | 0          | 15         | 30          | 15          | 255         |
| 16                         | 1                                                         | 0         | 0          | 0          | 1          | 8          | 16                                                                 | 0          | 0          | 0           | 16          | 128         |
| 17                         | 2                                                         | 0         | 0          | 0          | 1          | 11         | 34                                                                 | 0          | 0          | 0           | 17          | 187         |
| 18                         | 0                                                         | 0         | 0          | 0          | 0          | 5          | 0                                                                  | 0          | 0          | 0           | 0           | 90          |
| 19                         | 0                                                         | 0         | 0          | 0          | 0          | 6          | 0                                                                  | 0          | 0          | 0           | 0           | 114         |
| 20                         | 0                                                         | 0         | 0          | 0          | 0          | 4          | 0                                                                  | 0          | 0          | 0           | 0           | 80          |
| 21                         | 0                                                         | 0         | 0          | 0          | 0          | 3          | 0                                                                  | 0          | 0          | 0           | 0           | 63          |
| 22                         | 0                                                         | 0         | 0          | 0          | 0          | 3          | 0                                                                  | 0          | 0          | 0           | 0           | 66          |
| 23                         | 0                                                         | 0         | 0          | 0          | 0          | 1          | 0                                                                  | 0          | 0          | 0           | 0           | 23          |
| 24                         | 0                                                         | 0         | 0          | 0          | 0          | 2          | 0                                                                  | 0          | 0          | 0           | 0           | 48          |
| 25                         | 0                                                         | 0         | 0          | 0          | 0          | 2          | 0                                                                  | 0          | 0          | 0           | 0           | 50          |
| 26                         | 0                                                         | 0         | 0          | 0          | 0          | 2          | 0                                                                  | 0          | 0          | 0           | 0           | 52          |
| 27                         | 0                                                         | 0         | 0          | 0          | 0          | 4          | 0                                                                  | 0          | 0          | 0           | 0           | 108         |
| 28                         | 0                                                         | 0         | 0          | 0          | 0          | 2          | 0                                                                  | 0          | 0          | 0           | 0           | 56          |
| 29                         | 0                                                         | 0         | 0          | 0          | 0          | 0          | 0                                                                  | 0          | 0          | 0           | 0           | 0           |
| 30                         | 0                                                         | 0         | 0          | 0          | 0          | 2          | 0                                                                  | 0          | 0          | 0           | 0           | 60          |
| 31                         | 0                                                         | 0         | 0          | 0          | 0          | 1          | 0                                                                  | 0          | 0          | 0           | 0           | 31          |
| 32                         | 0                                                         | 0         | 0          | 0          | 0          | 1          | 0                                                                  | 0          | 0          | 0           | 0           | 32          |
| 33                         | 0                                                         | 0         | 0          | 0          | 0          | 1          | 0                                                                  | 0          | 0          | 0           | 0           | 33          |
| 34                         | 0                                                         | 0         | 0          | 0          | 0          | 0          | 0                                                                  | 0          | 0          | 0           | 0           | 0           |
| 35                         | 0                                                         | 0         | 0          | 0          | 0          | 0          | 0                                                                  | 0          | 0          | 0           | 0           | 0           |
| 36                         | 0                                                         | 0         | 0          | 0          | 0          | 1          | 0                                                                  | 0          | 0          | 0           | 0           | 36          |
| 37                         | 0                                                         | 0         | 0          | 0          | 0          | 0          | 0                                                                  | 0          | 0          | 0           | 0           | 0           |
| 38                         | 0                                                         | 0         | 0          | 0          | 0          | 0          | 0                                                                  | 0          | 0          | 0           | 0           | 0           |
| 39                         | 0                                                         | 0         | 0          | 0          | 0          | 1          | 0                                                                  | 0          | 0          | 0           | 0           | 39          |
| 40                         | 0                                                         | 0         | 0          | 0          | 0          | 0          | 0                                                                  | 0          | 0          | 0           | 0           | 0           |
| 53                         | 0                                                         | 0         | 0          | 0          | 0          | 1          | 0                                                                  | 0          | 0          | 0           | 0           | 53          |
| 76                         | 0                                                         | 0         | 0          | 0          | 0          | 1          | 0                                                                  | 0          | 0          | 0           | 0           | 76          |
| <b>TOTAL</b>               | <b>370</b>                                                | <b>86</b> | <b>121</b> | <b>155</b> | <b>173</b> | <b>889</b> | <b>2816</b>                                                        | <b>588</b> | <b>893</b> | <b>1125</b> | <b>1323</b> | <b>8621</b> |

**Supplementary Table 11.** Statistics of annotated gene models in *S. goreau* and *S. kawagutii*.

|                                                                               | <i>S. goreau</i> |        | <i>S. kawagutii</i> |        |
|-------------------------------------------------------------------------------|------------------|--------|---------------------|--------|
|                                                                               | number           | %      | number              | %      |
| Total number of gene models                                                   | 35,913           | 100.00 | 26,609              | 100.00 |
| Number of gene models with UniProt hits                                       | 31,646           | 88.12  | 21,947              | 82.48  |
| Number of gene models with Swiss-Prot top hits                                | 17,420           | 48.51  | 9,966               | 37.45  |
| Number of gene models with TrEMBL top hits                                    | 14,226           | 39.61  | 11,981              | 45.03  |
| Number of gene models with GO terms associated with Swiss-Prot or TrEMBL hits | 29,198           | 81.30  | 20,153              | 75.74  |
| Number of gene models with association with KEGG orthologs                    | 11,604           | 32.31  | 6,162               | 23.16  |
| Number of gene models with annotated Pfam domains                             | 19,718           | 54.90  | 11,628              | 43.70  |

**Supplementary Table 12.** List of top ten most abundant protein domains in *Symbiodinium*.

| <b>Pfam ID</b>                                       | <b>Domain</b>                                           | <b>Count</b> |
|------------------------------------------------------|---------------------------------------------------------|--------------|
| <b><i>Symbiodinium goreau</i> (Clade C)</b>          |                                                         |              |
| PF00069                                              | Protein kinase domain                                   | 494          |
| PF00005                                              | ABC transporter                                         | 441          |
| PF07727                                              | Reverse transcriptase (RNA-dependent DNA polymerase)    | 344          |
| PF00520                                              | Ion transport protein                                   | 314          |
| PF12796                                              | Ankyrin repeats (3 copies)                              | 292          |
| PF00072                                              | Response regulator receiver domain                      | 226          |
| PF02518                                              | Histidine kinase-, DNA gyrase B-, and HSP90-like ATPase | 220          |
| PF00884                                              | Sulfatase                                               | 218          |
| PF07690                                              | Major Facilitator Superfamily                           | 198          |
| PF00145                                              | C-5 cytosine-specific DNA methylase                     | 176          |
| <b><i>Symbiodinium kawagutii</i> (Clade F)</b>       |                                                         |              |
| PF07727                                              | Reverse transcriptase (RNA-dependent DNA polymerase)    | 538          |
| PF00145                                              | C-5 cytosine-specific DNA methylase                     | 445          |
| PF00069                                              | Protein kinase domain                                   | 374          |
| PF12796                                              | Ankyrin repeats (3 copies)                              | 302          |
| PF00078                                              | Reverse transcriptase (RNA-dependent DNA polymerase)    | 260          |
| PF00520                                              | Ion transport protein                                   | 246          |
| PF00665                                              | Integrase core domain                                   | 177          |
| PF00005                                              | ABC transporter                                         | 149          |
| PF00075                                              | RNase H                                                 | 124          |
| PF00226                                              | DnaJ domain                                             | 122          |
| <b><i>Symbiodinium microadriaticum</i> (Clade A)</b> |                                                         |              |
| PF07727                                              | Reverse transcriptase (RNA-dependent DNA polymerase)    | 1347         |
| PF12796                                              | Ankyrin repeats (3 copies)                              | 994          |
| PF00078                                              | Reverse transcriptase (RNA-dependent DNA polymerase)    | 797          |
| PF00069                                              | Protein kinase domain                                   | 745          |
| PF00520                                              | Ion transport protein                                   | 640          |
| PF00665                                              | Integrase core domain                                   | 368          |
| PF13499                                              | EF-hand domain pair                                     | 304          |
| PF00226                                              | DnaJ domain                                             | 239          |
| PF13637                                              | Ankyrin repeats (many copies)                           | 230          |
| PF13812                                              | Pentatricopeptide repeat domain                         | 217          |
| <b><i>Symbiodinium minutum</i> (Clade B)</b>         |                                                         |              |
| PF07727                                              | Reverse transcriptase (RNA-dependent DNA polymerase)    | 772          |
| PF00069                                              | Protein kinase domain                                   | 756          |
| PF12796                                              | Ankyrin repeats (3 copies)                              | 679          |
| PF00520                                              | Ion transport protein                                   | 668          |
| PF13499                                              | EF-hand domain pair                                     | 386          |
| PF00226                                              | DnaJ domain                                             | 285          |
| PF13041                                              | PPR repeat family                                       | 216          |
| PF13812                                              | Pentatricopeptide repeat domain                         | 215          |
| PF00076                                              | RNA recognition motif. (a.k.a. RRM; RBD; or RNP domain) | 211          |
| PF00665                                              | Integrase core domain                                   | 211          |

**Supplementary Table 13.** Reference proteins from 31 eukaryote species used in the Pfam domain enrichment analysis.

| Phylum/ Group  | Subgroup        | Species                                                                           | Data source                                                                                                                                                                          |
|----------------|-----------------|-----------------------------------------------------------------------------------|--------------------------------------------------------------------------------------------------------------------------------------------------------------------------------------|
| Alveolata      | Apicomplexa     | <i>Plasmodium falciparum</i>                                                      | ftp://ftp.ensemblgenomes.org/pub/protists/release-32/fasta/plasmodium_falciparum/pep/Plasmodium_falciparum.ASM276v1.pep.all.fa.gz                                                    |
| Alveolata      | Apicomplexa     | <i>Toxoplasma gondii</i>                                                          | ftp://ftp.ensemblgenomes.org/pub/protists/release-32/fasta/toxoplasma_gondii/pep/Toxoplasma_gondii.ToxoDB-7.1.pep.all.fa.gz                                                          |
| Alveolata      | Ciliate         | <i>Paramecium biaurelia</i>                                                       | http://paramecium.cgm.cnrs-gif.fr/download/species/pbiaurelia/biaurelia_V1-4_annotation_v1.protein.fa                                                                                |
| Alveolata      | Ciliate         | <i>Paramecium caudatum</i>                                                        | http://paramecium.cgm.cnrs-gif.fr/download/species/pcaudatum/caudatum_43c3d_annotation_v1.protein.fa                                                                                 |
| Alveolata      | Ciliate         | <i>Paramecium sexaurelia</i>                                                      | http://paramecium.cgm.cnrs-gif.fr/download/species/psexaurelia/sexaurelia_AZ8-4_annotation_v1.protein.fa                                                                             |
| Alveolata      | Ciliate         | <i>Paramecium tetraurelia</i>                                                     | ftp://ftp.ensemblgenomes.org/pub/protists/release-32/fasta/paramecium_tetraurelia/pep/Paramecium_tetraurelia.GCA_000165425.1.pep.all.f.a.gz                                          |
| Alveolata      | Dinoflagellate* | <i>Alexandrium tamarense</i> CCMP1771; MMETSP0382                                 | http://datacommons.cyverse.org/browse/iplant/home/shared/imicrobe/projects/                                                                                                          |
| Alveolata      | Dinoflagellate* | <i>Amphidinium carterae</i> CCMP1314; MMETSP0398/MMETSP0399/MMETSP0258/MMETSP0259 | http://datacommons.cyverse.org/browse/iplant/home/shared/imicrobe/projects/                                                                                                          |
| Alveolata      | Dinoflagellate* | <i>Gambierdiscus australes</i> CAWD149; MMETSP0766                                | http://datacommons.cyverse.org/browse/iplant/home/shared/imicrobe/projects/                                                                                                          |
| Alveolata      | Dinoflagellate* | <i>Heterocapsa triquetra</i> CCMP448; MMETSP0448                                  | http://datacommons.cyverse.org/browse/iplant/home/shared/imicrobe/projects/                                                                                                          |
| Alveolata      | Dinoflagellate* | <i>Karenia brevis</i> CCMP2229; MMETSP0029                                        | http://datacommons.cyverse.org/browse/iplant/home/shared/imicrobe/projects/                                                                                                          |
| Alveolata      | Dinoflagellate* | <i>Karlodinium micrum</i> CCMP2283; MMETSP1015                                    | http://datacommons.cyverse.org/browse/iplant/home/shared/imicrobe/projects/                                                                                                          |
| Alveolata      | Dinoflagellate* | <i>Lingulodinium polyedra</i> CCMP1738; MMETSP1033                                | http://datacommons.cyverse.org/browse/iplant/home/shared/imicrobe/projects/                                                                                                          |
| Alveolata      | Dinoflagellate* | <i>Polarella glacialis</i> CCMP1383; MMETSP0227; CCMP2088; MMETSP1440             | http://datacommons.cyverse.org/browse/iplant/home/shared/imicrobe/projects/                                                                                                          |
| Alveolata      | Dinoflagellate* | <i>Prorocentrum minimum</i> CCMP1329; MMETSP0053                                  | http://datacommons.cyverse.org/browse/iplant/home/shared/imicrobe/projects/                                                                                                          |
| Alveolata      | Dinoflagellate* | <i>Scrippsiella hangoei</i> SHTV5; MMETSP0359/MMETSP0360                          | http://datacommons.cyverse.org/browse/iplant/home/shared/imicrobe/projects/                                                                                                          |
| Alveolata      | Dinoflagellate* | <i>Symbiodinium goreau</i>                                                        | <b>This study</b>                                                                                                                                                                    |
| Alveolata      | Dinoflagellate* | <i>Symbiodinium kawagutii</i>                                                     | <b>This study</b>                                                                                                                                                                    |
| Alveolata      | Dinoflagellate* | <i>Symbiodinium microadriaticum</i>                                               | http://smic.reefgenomics.org/download/Smic.genome.annotation.pep.longest.fa.gz                                                                                                       |
| Alveolata      | Dinoflagellate* | <i>Symbiodinium minutum</i>                                                       | http://marinegenomics.oist.jp/symb/download/symbB.v1.2.augustus.prot.fa.gz                                                                                                           |
| Alveolata      | Perkinsea*      | <i>Perkinsus marinus</i>                                                          | http://mirrors.vbi.vt.edu/mirrors/ftp.ncbi.nih.gov/genomes/refseq/protozoa/Perkinsus_marinus/representative/GCF_000006405.1_JCV1_PMG_1.0/GCF_000006405.1_JCV1_PMG_1.0_protein.faa.gz |
| Stramenopiles  | Diatom          | <i>Phaeodactylum tricornutum</i>                                                  | ftp://ftp.ensemblgenomes.org/pub/protists/release-32/fasta/phaeodactylum_tricornutum/pep/Phaeodactylum_tricornutum.ASM15095v2.pep.all.fa.gz                                          |
| Stramenopiles  | Diatom          | <i>Thalassiosira pseudonana</i>                                                   | ftp://ftp.ensemblgenomes.org/pub/protists/release-32/fasta/thalassiosira_pseudonana/pep/Thalassiosira_pseudonana.ASM14940v2.pep.all.fa.gz                                            |
| Archaeplastida | Angiosperm      | <i>Arabidopsis thaliana</i>                                                       | ftp://ftp.arabidopsis.org/home/tair/Proteins/TAIR10_protein_lists/TAIR10_pep_20101214                                                                                                |
| Archaeplastida | Green algae     | <i>Chlamydomonas reinhardtii</i>                                                  | ftp://ftp.ensemblgenomes.org/pub/plants/release-32/fasta/chlamydomonas_reinhardtii/pep/Chlamydomonas_reinhardtii.v3.1.pep.all.fa.gz                                                  |
| Archaeplastida | Green algae     | <i>Micromonas commoda</i> RCC299                                                  | http://genome.jgi.doe.gov/pages/dynamicOrganismDownload.jsf?organism=Phytozome                                                                                                       |
| Archaeplastida | Green algae     | <i>Micromonas pusilla</i> CCMP1545                                                | ftp://ftp.ncbi.nlm.nih.gov/genomes/all/GCF/000/151/265/GCF_000151265.2_Micromonas_pusilla_CCMP1545_v2.0/GCF_000151265.2_Micromonas_pusilla_CCMP1545_v2.0_protein.faa.gz              |
| Archaeplastida | Red algae       | <i>Chondrus crispus</i>                                                           | ftp://ftp.ensemblgenomes.org/pub/plants/release-32/fasta/plants_rhodophyta1_collection/chondrus_crispus/pep/Chondrus_crispus.ASM35022v2.pep.all.fa.gz                                |
| Archaeplastida | Red algae       | <i>Cyanidioschyzon merolae</i>                                                    | ftp://ftp.ensemblgenomes.org/pub/plants/release-32/fasta/cyanidioschyzon_merolae/pep/Cyanidioschyzon_merolae.ASM9120v1.pep.all.fa.gz                                                 |
| Archaeplastida | Red algae       | <i>Galdieria sulphuraria</i>                                                      | ftp://ftp.ensemblgenomes.org/pub/plants/release-32/fasta/plants_rhodophyta1_collection/galdieria_sulphuraria/pep/Galdieria_sulphuraria.ASM34128v1.pep.all.fa.gz                      |
| Archaeplastida | Red algae       | <i>Porphyridium purpureum</i>                                                     | http://cyanophora.rutgers.edu/porphyridium/Porphyridium_genemodels_UPDATED.fasta                                                                                                     |

\*: The 14 dinoflagellates and 1 Perkinsea species constitute the 15-taxon set.

**Supplementary Table 14.** Homologous protein sets used in this study.

|                                                                                      | <b>31-taxon set</b> | <b>15-taxon set</b> |
|--------------------------------------------------------------------------------------|---------------------|---------------------|
| Number of proteins                                                                   | 1,136,347           | 880,969             |
| Number of homologous sets*                                                           | 56,530              | 44,282              |
| Number of singletons                                                                 | 310,288             | 266,335             |
| Number of homologous proteins in a set                                               | 826,059             | 614,634             |
| Percentage of proteins in homologous sets                                            | 72.20               | 69.80               |
| Number of orthogroups containing only proteins from <i>Symbiodinium</i> <sup>^</sup> | 2,776               | 3,180               |
| Number of <i>Symbiodinium</i> singletons <sup>^</sup>                                | 21,812              | 24,508              |
| Mean size of homologous protein sets                                                 | 14.60               | 13.90               |

\*: a set here is referred to as an "orthogroup" in OrthoFinder (Emms and Kelly, 2015); each "orthogroup" consists of homologous proteins including orthologs and paralogs.

<sup>^</sup>: all proteins in these two sets are considered *Symbiodinium*-specific.



**Supplementary Table 15.** *Symbiodinium* genes with putative functions relevant to mycosporine-like amino acid biosynthesis.

| Query group    | Query - source of organism                                         | Query - putative function | Gene name            | UniProt Identifier         | Query protein description                                          | Query len. | <i>S. microadriaticum</i> (clade A) |           |          | <i>S. minutum</i> (clade B) |          |          | <i>S. goreau</i> (clade C) |          |          | <i>S. kawagutii</i> (clade F) |          |          |
|----------------|--------------------------------------------------------------------|---------------------------|----------------------|----------------------------|--------------------------------------------------------------------|------------|-------------------------------------|-----------|----------|-----------------------------|----------|----------|----------------------------|----------|----------|-------------------------------|----------|----------|
|                |                                                                    |                           |                      |                            |                                                                    |            | Hit                                 | E-value   | Aln len. | Hit                         | E-value  | Aln len. | Hit                        | E-value  | Aln len. | Hit                           | E-value  | Aln len. |
| Actinobacteria | <i>Actinosynnemamirum</i> DSM 43827                                | ATP-grasp                 | ACU38111.1           | C6WIM1_A CTMD              | D-alanine--D-alanine ligase                                        | 339        | Smic31738                           | 7.00E-75  | 335      | NA                          | NA       | NA       | SymbC1.scaffol d2594.3     | 8.00E-25 | 185      | SymbF.scaffol d249.18         | 3.00E-10 | 198      |
| Actinobacteria | <i>Actinosynnemamirum</i> DSM 43827                                | ATP-grasp                 | ACU38112.1           | C6WIM2_A CTMD              | Uncharacterized protein                                            | 429        | Smic19143                           | 6.00E-35  | 351      | NA                          | NA       | NA       | NA                         | NA       | NA       | NA                            | NA       | NA       |
| Actinobacteria | <i>Pseudonocardia</i> sp. P1                                       | ATP-grasp                 | WP_01024243315.1     | WP_010243315.1 (NCBI)      | D-alanine--D-alanine ligase                                        | 346        | Smic31738                           | 3.00E-67  | 332      | NA                          | NA       | NA       | SymbC1.scaffol d2594.3     | 2.00E-24 | 183      | SymbF.scaffol d37.151         | 3.00E-09 | 129      |
| Actinobacteria | <i>Pseudonocardia</i> sp. P1                                       | ATP-grasp                 | WP_01024243317.1     | WP_010243317.1 (NCBI)      | ATP-grasp domain-containing protein                                | 411        | Smic19143                           | 1.00E-33  | 308      | NA                          | NA       | NA       | NA                         | NA       | NA       | NA                            | NA       | NA       |
| Cnidaria       | <i>Nematostella vectensis</i>                                      | ATP-grasp                 | EDO41319             | A7S4P1_N EMVE              | ATP-grasp domain-containing protein                                | 594        | Smic19143                           | 3.00E-19  | 307      | NA                          | NA       | NA       | NA                         | NA       | NA       | NA                            | NA       | NA       |
| Cyanobacteria  | <i>Anabaena variabilis</i> ATCC 29413                              | ATP-grasp                 | ava:Ava_29413.3856   | Q3M6C5_A NAVT              | ATP-grasp enzyme-like protein                                      | 458        | Smic19143                           | 3.00E-43  | 350      | NA                          | NA       | NA       | NA                         | NA       | NA       | NA                            | NA       | NA       |
| Cyanobacteria  | <i>Aphanothece halophytica</i>                                     | ATP-grasp                 | saltStres29413.916.1 | W8VR81_A PHHA              | D-alanine--D-alanine ligase                                        | 339        | Smic31738                           | 2.00E-59  | 350      | NA                          | NA       | NA       | SymbC1.scaffol d2594.3     | 4.00E-27 | 159      | SymbF.scaffol d249.18         | 2.00E-10 | 203      |
| Cyanobacteria  | <i>Aphanothece halophytica</i>                                     | ATP-grasp                 | saltStres29413.915.1 | W8VTF0_A PHHA              | C-N ligase                                                         | 444        | Smic19143                           | 1.00E-43  | 332      | NA                          | NA       | NA       | NA                         | NA       | NA       | NA                            | NA       | NA       |
| Cyanobacteria  | <i>Nostoc punctiforme</i> ATCC 29133                               | ATP-grasp                 | npu:Npu_29133.8      | B2J6X6_N OSP7              | D-alanine--D-alanine ligase                                        | 348        | Smic31738                           | 3.00E-78  | 335      | NA                          | NA       | NA       | SymbC1.scaffol d2594.3     | 5.00E-29 | 185      | SymbF.scaffol d249.18         | 6.00E-11 | 203      |
| Cyanobacteria  | <i>Nostoc punctiforme</i> ATCC 29133                               | ATP-grasp                 | npu:Npu_29133.8      | B2J6X7_N OSP7              | Uncharacterized protein                                            | 461        | Smic19143                           | 1.00E-39  | 369      | NA                          | NA       | NA       | NA                         | NA       | NA       | NA                            | NA       | NA       |
| Cyanobacteria  | <i>Scytonema cf crispum</i> UCFS10                                 | ATP-grasp                 | ANY58985.1           | A0A1B2CW F7_9CYAN          | ATP-grasp domain-containing protein                                | 463        | Smic19143                           | 5.00E-40  | 392      | NA                          | NA       | NA       | NA                         | NA       | NA       | NA                            | NA       | NA       |
| Cyanobacteria  | <i>Scytonema cf crispum</i> UCFS10                                 | ATP-grasp                 | ANY58992.1           | A0A1B2CW G9_9CYAN          | ATP-grasp domain-containing protein                                | 463        | Smic19143                           | 5.00E-40  | 392      | NA                          | NA       | NA       | NA                         | NA       | NA       | NA                            | NA       | NA       |
| Cyanobacteria  | <i>Scytonema cf crispum</i> UCFS15                                 | ATP-grasp                 | ACL_A_29413.55830    | A1C9L1_A SPCL              | Uncharacterized protein                                            | 496        | Smic19143                           | 2.00E-25  | 391      | NA                          | NA       | NA       | NA                         | NA       | NA       | NA                            | NA       | NA       |
| Actinobacteria | <i>Actinosynnemamirum</i> DSM 43827                                | DHQS                      | ACU38114.1           | C6WIM4_A CTMD              | 3-dehydroquininate synthase                                        | 406        | Smic43919                           | 4.00E-64  | 366      | symbB.v1.2.0 28953.t1       | 3.00E-28 | 244      | SymbC1.scaffol d2.2020     | 6.00E-46 | 346      | SymbF.scaffol d11.23          | 5.00E-28 | 343      |
| Actinobacteria | <i>Pseudonocardia</i> sp. P1                                       | DHQS                      | WP_01024243321.1     | WP_010243321.1 (NCBI)      | 3-dehydroquininate synthase                                        | 409        | Smic43919                           | 5.00E-69  | 369      | symbB.v1.2.0 28953.t1       | 3.00E-29 | 244      | SymbC1.scaffol d21.53      | 8.00E-41 | 341      | SymbF.scaffol d11.23          | 3.00E-33 | 335      |
| Actinobacteria | <i>Streptomyces hygroscopicus</i> subsp. <i>jinggansensis</i> 5008 | DHQS                      | 4P53AJ_5008.PDBIDC   | VALA_STR HJ HAINISE QUENCE | 2-epi-5-epi-valiolone synthase                                     | 420        | Smic43919                           | 7.00E-58  | 356      | symbB.v1.2.0 28953.t1       | 6.00E-34 | 274      | SymbC1.scaffol d2.2020     | 8.00E-64 | 380      | SymbF.scaffol d11.23          | 3.00E-31 | 355      |
| Cnidaria       | <i>Nematostella vectensis</i>                                      | DHQS                      | EDO40476             | A7S759_N EMVE              | DHQ synthase                                                       | 352        | Smic43919                           | 1.00E-172 | 351      | symbB.v1.2.0 28953.t1       | 4.00E-24 | 253      | SymbC1.scaffol d2.2020     | 3.00E-26 | 345      | SymbF.scaffol d11.23          | 4.00E-21 | 333      |
| Cyanobacteria  | <i>Anabaena variabilis</i> ATCC 29413                              | DHQS                      | ava:Ava_29413.3858   | DDGS_AN AVT                | Demethyl-4-deoxygadusol synthase                                   | 410        | Smic43919                           | 6.00E-76  | 372      | symbB.v1.2.0 28953.t1       | 7.00E-27 | 242      | SymbC1.scaffol d2.2020     | 8.00E-42 | 349      | SymbF.scaffol d11.23          | 3.00E-23 | 324      |
| Cyanobacteria  | <i>Aphanothece halophytica</i>                                     | DHQS                      | saltStres29413.913.1 | W8VKF5_A PHHA              | Demethyl-4-deoxygadusol synthase                                   | 587        | Smic35309                           | 4.00E-173 | 569      | symbB.v1.2.0 28953.t1       | 3.00E-21 | 248      | SymbC1.scaffol d8151.2     | 2.00E-36 | 283      | SymbF.scaffol d11.23          | 4.00E-15 | 334      |
| Cyanobacteria  | <i>Nostoc punctiforme</i> ATCC 29133                               | DHQS                      | npu:Npu_29133.0      | DDGS_NO SP7                | Demethyl-4-deoxygadusol synthase                                   | 410        | Smic2116                            | 2.00E-71  | 370      | symbB.v1.2.0 28953.t1       | 8.00E-25 | 242      | SymbC1.scaffol d2.2020     | 4.00E-48 | 332      | SymbF.scaffol d11.23          | 1.00E-26 | 322      |
| Cyanobacteria  | <i>Scytonema cf crispum</i> UCFS10                                 | DHQS                      | ANY58986.1           | A0A1B2CW G1_9CYAN          | 3-dehydroquininate synthase                                        | 409        | Smic43919                           | 1.00E-72  | 382      | symbB.v1.2.0 28953.t1       | 2.00E-26 | 246      | SymbC1.scaffol d2.2020     | 2.00E-50 | 335      | SymbF.scaffol d11.23          | 2.00E-31 | 340      |
| Cyanobacteria  | <i>Scytonema cf crispum</i> UCFS15                                 | DHQS                      | ANY58993.1           | A0A1B2CW G5_9CYAN          | 3-dehydroquininate synthase                                        | 409        | Smic43919                           | 1.00E-72  | 382      | symbB.v1.2.0 28953.t1       | 2.00E-26 | 246      | SymbC1.scaffol d2.2020     | 2.00E-50 | 335      | SymbF.scaffol d11.23          | 2.00E-31 | 340      |
| Fungi          | <i>Aspergillus clavatus</i> NRRL 1                                 | DHQS                      | ACL_A_55850          | A1C9L3_A SPCL              | 3-dehydroquininate synthase, putative                              | 459        | Smic2116                            | 3.00E-72  | 371      | symbB.v1.2.0 28953.t1       | 7.00E-28 | 265      | SymbC1.scaffol d2.2020     | 2.00E-34 | 351      | SymbF.scaffol d11.23          | 3.00E-25 | 328      |
| Fungi          | <i>Aspergillus nidulans</i> FGSC A4                                | DHQS                      | trjQ5AZ77_7_EMENI    | Q5AZ77_7_EMENI             | 3-dehydroquininate synthase                                        | 483        | Smic43919                           | 1.00E-69  | 368      | symbB.v1.2.0 28953.t1       | 6.00E-25 | 265      | SymbC1.scaffol d2.2020     | 3.00E-34 | 351      | SymbF.scaffol d11.23          | 2.00E-24 | 327      |
| Metazoa        | <i>Danio rerio</i>                                                 | DHQS                      | trjE7EXW6_D ANRE     | E7EXW6_D ANRE              | 2-epi-5-epi-valiolone synthase                                     | 470        | Smic2116                            | 1.00E-49  | 413      | symbB.v1.2.0 28953.t1       | 6.00E-27 | 259      | SymbC1.scaffol d2.2020     | 2.00E-48 | 368      | SymbF.scaffol d11.23          | 9.00E-24 | 339      |
| Metazoa        | <i>Danio rerio</i>                                                 | DHQS                      | trjQ5BLE6_D ANRE     | Q5BLE6_D ANRE              | Zgc:113054                                                         | 551        | Smic2116                            | 3.00E-45  | 268      | symbB.v1.2.0 20911.t1       | 3.00E-29 | 264      | SymbC1.scaffol d2.1851     | 4.00E-38 | 248      | SymbF.scaffol d11.10          | 7.00E-36 | 243      |
| Dinoflagellata | <i>Heterocapsa triquetra</i>                                       | DHQS/O-MT                 | ABF61766             | F15BR2_H ETTR              | Chloroplast 3-dehydroquininate synthase/O-methyltransferase fusion | 951        | Smic2116                            | 0.00      | 943      | symbB.v1.2.0 28953.t1       | 2.00E-19 | 255      | SymbC1.scaffol d8151.2     | 2.00E-90 | 269      | SymbF.scaffol d313.28         | 8.00E-11 | 140      |
| Cyanobacteria  | <i>Anabaena variabilis</i> ATCC 29413                              | NRPS                      | ava:Ava_29413.3855   | Q3M6C6_A NAVT              | Amino acid adenylation                                             | 888        | Smic3690                            | 2.00E-101 | 616      | symbB.v1.2.0 12436.t1       | 8.00E-78 | 474      | SymbC1.scaffol d70.75      | 0.00     | 720      | SymbF.scaffol d1354.11        | 4.00E-68 | 481      |
| Cyanobacteria  | <i>Scytonema cf crispum</i> UCFS10                                 | NRPS                      | ANY58984.1           | A0A1B2CW G3_9CYAN          | Non-ribosomal synthetase                                           | 1328       | Smic3690                            | 7.00E-104 | 808      | symbB.v1.2.0 12436.t1       | 6.00E-90 | 982      | SymbC1.scaffol d70.75      | 0.00     | 1169     | SymbF.scaffol d213.33         | 3.00E-63 | 635      |
| Cyanobacteria  | <i>Scytonema cf crispum</i> UCFS15                                 | NRPS                      | ANY58991.1           | A0A1B2CW H8_9CYAN          | Non-ribosomal synthetase                                           | 1328       | Smic3690                            | 7.00E-104 | 808      | symbB.v1.2.0 12436.t1       | 6.00E-90 | 982      | SymbC1.scaffol d70.75      | 0.00     | 1169     | SymbF.scaffol d213.33         | 3.00E-63 | 635      |
| Actinobacteria | <i>Actinosynnemamirum</i> DSM 43827                                | O-MT                      | ACU38113.1           | C6WIM3_A CTMD              | O-methyltransferase family 3                                       | 284        | Smic1333                            | 2.00E-38  | 230      | symbB.v1.2.0 06248.t1       | 2.00E-26 | 191      | SymbC1.scaffol d2377.8     | 2.00E-28 | 192      | SymbF.scaffol d308.24         | 9.00E-13 | 113      |
| Actinobacteria | <i>Pseudonocardia</i> sp. P1                                       | O-MT                      | WP_01024243319.1     | WP_010243319.1 (NCBI)      | SAM-dependent methyltransferase                                    | 250        | Smic2116                            | 2.00E-42  | 257      | symbB.v1.2.0 06248.t1       | 7.00E-19 | 241      | SymbC1.scaffol d25.7       | 8.00E-23 | 175      | SymbF.scaffol d313.28         | 2.00E-10 | 160      |
| Cnidaria       | <i>Nematostella vectensis</i>                                      | O-MT                      | EDO40475             | A7S759_N EMVE              | O-methyltransferase activity                                       | 174        | Smic1333                            | 2.00E-27  | 179      | symbB.v1.2.0 06248.t1       | 6.00E-12 | 185      | SymbC1.scaffol d25.7       | 1.00E-21 | 168      | SymbF.scaffol d308.24         | 6.00E-07 | 109      |

| Query group   | Query - source of organism     | Query - putative function | Gene name              | UniProt Identifier | Query protein description    | Query len. | <i>S. microadriaticum</i> (clade A) |          |          | <i>S. minutum</i> (clade B) |          |          | <i>S. goreauii</i> (clade C) |          |          | <i>S. kawagutii</i> (clade F) |          |          |
|---------------|--------------------------------|---------------------------|------------------------|--------------------|------------------------------|------------|-------------------------------------|----------|----------|-----------------------------|----------|----------|------------------------------|----------|----------|-------------------------------|----------|----------|
|               |                                |                           |                        |                    |                              |            | Hit                                 | E-value  | Aln len. | Hit                         | E-value  | Aln len. | Hit                          | E-value  | Aln len. | Hit                           | E-value  | Aln len. |
| Cyanobacteria | Anabaena variabilis ATCC 29413 | O-MT                      | ava:Ava_3857           | Q3M6C4_NAVT        | O-methyltransferase family 3 | 279        | Smic2116                            | 5.00E-45 | 238      | symbB.v1.2.0_06248.t1       | 5.00E-25 | 194      | SymbC1.scaffold2377.8        | 5.00E-33 | 195      | SymbF.scaffold308.24          | 1.00E-10 | 116      |
| Cyanobacteria | Aphanothece halophytica        | O-MT                      | saltStress:BAO51914.1  | W8VY25_A_PPHA      | O-methyltransferase family 3 | 279        | Smic2116                            | 2.00E-49 | 273      | symbB.v1.2.0_18440.t1       | 6.00E-20 | 216      | SymbC1.scaffold25.7          | 4.00E-26 | 174      | SymbF.scaffold308.24          | 2.00E-13 | 122      |
| Cyanobacteria | Nostoc punctiforme ATCC 29133  | O-MT                      | npu:Npu_9              | B2J6X8_NOSP7       | O-methyltransferase family 3 | 277        | Smic1333                            | 1.00E-45 | 253      | symbB.v1.2.0_18440.t1       | 2.00E-24 | 205      | SymbC1.scaffold2377.8        | 8.00E-28 | 191      | SymbF.scaffold308.24          | 4.00E-11 | 124      |
| Cyanobacteria | Scytonema cf crispum UCFS15    | O-MT                      | ANY58987.1             | A0A1B2CW_H0_9CYAN  | O-methyltransferase          | 296        | Smic2116                            | 2.00E-47 | 225      | symbB.v1.2.0_18440.t1       | 1.00E-28 | 200      | SymbC1.scaffold2377.8        | 1.00E-28 | 191      | SymbF.scaffold308.24          | 1.00E-12 | 124      |
| Cyanobacteria | Scytonema cf crispum UCFS15    | O-MT                      | ANY58994.1             | A0A1B2CW_H5_9CYAN  | O-methyltransferase          | 296        | Smic2116                            | 2.00E-47 | 225      | symbB.v1.2.0_18440.t1       | 1.00E-28 | 200      | SymbC1.scaffold2377.8        | 1.00E-28 | 191      | SymbF.scaffold308.24          | 1.00E-12 | 124      |
| Fungi         | Aspergillus clavatus NRRL 1    | O-MT                      | ACLA_055840            | A1C9L2_A_SPL       | O-methyltransferase putative | 286        | Smic3139                            | 9.00E-24 | 194      | symbB.v1.2.0_14617.t2       | 5.00E-26 | 201      | SymbC1.scaffold2416.1        | 3.00E-23 | 179      | SymbF.scaffold593.9           | 1.00E-23 | 205      |
| Fungi         | Aspergillus nidulans FGSC A4   | O-MT/ATP-grasp            | trjQ5AZ78 Q5AZ78 EMEN1 | Q5AZ78_MENI        | Uncharacterized protein      | 816        | Smic19143                           | 2.00E-26 | 402      | symbB.v1.2.0_14617.t2       | 3.00E-26 | 240      | SymbC1.scaffold5773.1        | 9.00E-22 | 183      | SymbF.scaffold593.9           | 1.00E-23 | 205      |
| Cyanobacteria | Scytonema cf crispum UCFS10    | Short-chain dehydrogenase | ANY58988.1             | A0A1B2CW_F8_9CYAN  | Short-chain dehydrogenase    | 293        | Smic1413                            | 5.00E-27 | 236      | symbB.v1.2.0_20911.t1       | 3.00E-24 | 258      | SymbC1.scaffold2890.25       | 1.00E-34 | 252      | SymbF.scaffold270.25          | 1.00E-24 | 233      |
| Cyanobacteria | Scytonema cf crispum UCFS10    | Short-chain dehydrogenase | ANY58995.1             | A0A1B2CW_H2_9CYAN  | short-chain dehydrogenase    | 293        | Smic1413                            | 5.00E-27 | 236      | symbB.v1.2.0_20911.t1       | 3.00E-24 | 258      | SymbC1.scaffold2890.25       | 1.00E-34 | 252      | SymbF.scaffold270.25          | 1.00E-24 | 233      |

**Supplementary Table 16.** BLASTP hits ( $E < 10^{-5}$ ) in *Symbiodinium* for each of the 18 *Nostoc punctiforme* proteins involved in scytonemin biosynthesis.

| Protein                                                                                        | <i>S. microadriaticum</i> (A)                  |                                              | <i>S. minutum</i> (B)                                                                                                |                                                          | <i>S. goreau</i> (C)                                                                                                                                                                                                                                                                                                                                                                                                                                                                                                                                                                                                                                                                                                 |                                                                                                                                                                                                                                                                                                                                              | <i>S. kawagutii</i> (F)                                                                     |                                              |
|------------------------------------------------------------------------------------------------|------------------------------------------------|----------------------------------------------|----------------------------------------------------------------------------------------------------------------------|----------------------------------------------------------|----------------------------------------------------------------------------------------------------------------------------------------------------------------------------------------------------------------------------------------------------------------------------------------------------------------------------------------------------------------------------------------------------------------------------------------------------------------------------------------------------------------------------------------------------------------------------------------------------------------------------------------------------------------------------------------------------------------------|----------------------------------------------------------------------------------------------------------------------------------------------------------------------------------------------------------------------------------------------------------------------------------------------------------------------------------------------|---------------------------------------------------------------------------------------------|----------------------------------------------|
|                                                                                                | Hit(s)                                         | E-value                                      | Hit(s)                                                                                                               | E-value                                                  | Hit(s)                                                                                                                                                                                                                                                                                                                                                                                                                                                                                                                                                                                                                                                                                                               | E-value                                                                                                                                                                                                                                                                                                                                      | Hit(s)                                                                                      | E-value                                      |
| UniProt ID:<br>B2IXH5<br>Gene: <i>scyA</i><br>Gene ID in <i>N. punctiforme</i> :<br>Npun_R1276 | Smic28555<br>Smic21519<br>Smic26902            | 5.00E-14<br>3.00E-11<br>6.00E-11             | symbB.v1.2.035008.t1<br>symbB.v1.2.032800.t1<br>symbB.v1.2.034800.t2<br>symbB.v1.2.034800.t1                         | 5.00E-19<br>8.00E-14<br>1.00E-10<br>2.00E-10             | SymbC1.scaffold2.2026<br>SymbC1.scaffold1.2344<br>SymbC1.scaffold4.363<br>SymbC1.scaffold4.284<br>SymbC1.scaffold9.174<br>SymbC1.scaffold5.1134<br>SymbC1.scaffold25.119<br>SymbC1.scaffold1.1299<br>SymbC1.scaffold5.414<br>SymbC1.scaffold540.25<br>SymbC1.scaffold2.1375<br>SymbC1.scaffold4.1019<br>SymbC1.scaffold1.1273<br>SymbC1.scaffold4.971<br>SymbC1.scaffold2.950<br>SymbC1.scaffold109.61<br>SymbC1.scaffold35850.1<br>SymbC1.scaffold241.78<br>SymbC1.scaffold15.162<br>SymbC1.scaffold2.1994<br>SymbC1.scaffold5156.2<br>SymbC1.scaffold5001.1<br>SymbC1.scaffold4102.1<br>SymbC1.scaffold3142.3<br>SymbC1.scaffold1672.2<br>SymbC1.scaffold21415.1<br>SymbC1.scaffold5131.1<br>SymbC1.scaffold241.24 | 1.00E-40<br>5.00E-32<br>2.00E-27<br>4.00E-27<br>6.00E-27<br>2.00E-25<br>1.00E-24<br>1.00E-23<br>1.00E-22<br>4.00E-22<br>1.00E-20<br>2.00E-20<br>6.00E-20<br>8.00E-20<br>2.00E-19<br>3.00E-19<br>1.00E-18<br>2.00E-18<br>4.00E-18<br>8.00E-17<br>3.00E-15<br>1.00E-14<br>1.00E-12<br>7.00E-08<br>9.00E-08<br>7.00E-07<br>7.00E-07<br>7.00E-06 | SymbF.scaffold35.95<br>SymbF.scaffold3271.1<br>SymbF.scaffold520.14<br>SymbF.scaffold1982.4 | 3.00E-28<br>3.00E-20<br>7.00E-16<br>4.00E-08 |
| UniProt ID:<br>B2IXH4<br>Gene: <i>scyB</i><br>Gene ID in <i>N. punctiforme</i> :<br>Npun_R1275 | No hits                                        | N/A                                          | No hits                                                                                                              | N/A                                                      | SymbC1.scaffold1093.35<br>SymbC1.scaffold2.1837<br>SymbC1.scaffold14551.5<br>SymbC1.scaffold32.93<br>SymbC1.scaffold37069.1                                                                                                                                                                                                                                                                                                                                                                                                                                                                                                                                                                                          | 6.00E-83<br>3.00E-22<br>8.00E-18<br>2.00E-14<br>1.00E-11                                                                                                                                                                                                                                                                                     | SymbF.scaffold8.273<br>SymbF.scaffold3240.3                                                 | 8.00E-86<br>5.00E-06                         |
| UniProt ID:<br>B2IXH3<br>Gene: <i>scyC</i><br>Gene ID in <i>N. punctiforme</i> :<br>Npun_R1274 | No hits                                        | N/A                                          | No hits                                                                                                              | N/A                                                      | No hits                                                                                                                                                                                                                                                                                                                                                                                                                                                                                                                                                                                                                                                                                                              | N/A                                                                                                                                                                                                                                                                                                                                          | No hits                                                                                     | N/A                                          |
| UniProt ID:<br>B2IXH2<br>Gene: <i>scyD</i><br>Gene ID in <i>N. punctiforme</i> :<br>Npun_R1273 | No hits                                        | N/A                                          | No hits                                                                                                              | N/A                                                      | No hits                                                                                                                                                                                                                                                                                                                                                                                                                                                                                                                                                                                                                                                                                                              | N/A                                                                                                                                                                                                                                                                                                                                          | No hits                                                                                     | N/A                                          |
| UniProt ID:<br>B2IXH1<br>Gene: <i>scyE</i><br>Gene ID in <i>N. punctiforme</i> :<br>Npun_R1272 | No hits                                        | N/A                                          | No hits                                                                                                              | N/A                                                      | No hits                                                                                                                                                                                                                                                                                                                                                                                                                                                                                                                                                                                                                                                                                                              | N/A                                                                                                                                                                                                                                                                                                                                          | No hits                                                                                     | N/A                                          |
| UniProt ID:<br>B2IXH0<br>Gene: <i>scyF</i><br>Gene ID in <i>N. punctiforme</i> :<br>Npun_R1271 | Smic37965<br>Smic11872<br>Smic722<br>Smic37012 | 4.00E-16<br>6.00E-12<br>1.00E-11<br>2.00E-06 | symbB.v1.2.008932.t1<br>symbB.v1.2.008932.t1<br>symbB.v1.2.000102.t1<br>symbB.v1.2.034012.t1<br>symbB.v1.2.040186.t1 | 3.00E-14<br>9.00E-10<br>2.00E-13<br>3.00E-08<br>1.00E-07 | SymbC1.scaffold1093.35<br>SymbC1.scaffold2.1837<br>SymbC1.scaffold14551.5<br>SymbC1.scaffold32.93<br>SymbC1.scaffold37069.1<br>SymbC1.scaffold4.1475<br>SymbC1.scaffold8194.1                                                                                                                                                                                                                                                                                                                                                                                                                                                                                                                                        | 6.00E-83<br>3.00E-22<br>8.00E-18<br>2.00E-14<br>1.00E-11<br>1.00E-07<br>6.00E-07                                                                                                                                                                                                                                                             | SymbF.scaffold74.4<br>SymbF.scaffold27.38                                                   | 4.00E-07<br>6.00E-06                         |

| Protein                                                                                                  | <i>S. microadriaticum</i> (A)                                             |                                                                      | <i>S. minutum</i> (B)                                                |                                  | <i>S. goreau</i> (C)                                                                                                                                                                                                                                                                                                                                                                                                                                                                                                               |                                                                                                                                                                                                                                                      | <i>S. kawagutii</i> (F)                     |                      |
|----------------------------------------------------------------------------------------------------------|---------------------------------------------------------------------------|----------------------------------------------------------------------|----------------------------------------------------------------------|----------------------------------|------------------------------------------------------------------------------------------------------------------------------------------------------------------------------------------------------------------------------------------------------------------------------------------------------------------------------------------------------------------------------------------------------------------------------------------------------------------------------------------------------------------------------------|------------------------------------------------------------------------------------------------------------------------------------------------------------------------------------------------------------------------------------------------------|---------------------------------------------|----------------------|
|                                                                                                          | Hit(s)                                                                    | E-value                                                              | Hit(s)                                                               | E-value                          | Hit(s)                                                                                                                                                                                                                                                                                                                                                                                                                                                                                                                             | E-value                                                                                                                                                                                                                                              | Hit(s)                                      | E-value              |
| UniProt ID: B2IXG9<br>Gene: Glycosyl-transferase<br>Gene ID in <i>N. punctiforme</i> : Npun_R1270        | Smic44385<br>Smic5216                                                     | 9.00E-12<br>8.00E-06                                                 | symbB.v1.2.002866.t1<br>symbB.v1.2.002866.t2<br>symbB.v1.2.026225.t1 | 2.00E-09<br>2.00E-09<br>3.00E-07 | SymbC1.scaffold410.29<br>SymbC1.scaffold2.386<br>SymbC1.scaffold9.56<br>SymbC1.scaffold17.9<br>SymbC1.scaffold5.1082<br>SymbC1.scaffold16.67<br>SymbC1.scaffold2.875<br>SymbC1.scaffold80.139<br>SymbC1.scaffold2.657<br>SymbC1.scaffold1.992<br>SymbC1.scaffold2.660<br>SymbC1.scaffold1401.15<br>SymbC1.scaffold5.635                                                                                                                                                                                                            | 1.00E-42<br>4.00E-39<br>1.00E-26<br>1.00E-24<br>1.00E-22<br>1.00E-17<br>8.00E-09<br>1.00E-08<br>4.00E-08<br>9.00E-08<br>2.00E-07<br>2.00E-06<br>5.00E-06                                                                                             | SymbF.scaffold2862.5                        | 4.00E-07             |
| UniProt ID: B2IXG8<br>Gene: <i>tyrA</i><br>Gene ID in <i>N. punctiforme</i> : Npun_R1269                 | No hits                                                                   | N/A                                                                  | No hits                                                              | N/A                              | No hits                                                                                                                                                                                                                                                                                                                                                                                                                                                                                                                            | N/A                                                                                                                                                                                                                                                  | No hits                                     | N/A                  |
| UniProt ID: B2IXG7<br>Gene: <i>dsbA</i><br>Gene ID in <i>N. punctiforme</i> : Npun_R1268                 | Smic39492<br>(recovered at 1e-4)                                          | 1.01E-04                                                             | symbB.v1.2.029824.t1                                                 | 1.00E-33                         | SymbC1.scaffold216.15<br>SymbC1.scaffold5154.6<br>SymbC1.scaffold19.147                                                                                                                                                                                                                                                                                                                                                                                                                                                            | 1.00E-23<br>9.00E-12<br>5.00E-09                                                                                                                                                                                                                     | SymbF.scaffold2870.9                        | 1.00E-12             |
| UniProt ID: B2IXG6<br>Gene: <i>aroB</i> ( <i>DHQS</i> )<br>Gene ID in <i>N. punctiforme</i> : Npun_R1267 | Smic42001<br>Smic2116<br>Smic43919<br>Smic35309<br>Smic35461<br>Smic12094 | 3.00E-32<br>1.00E-21<br>1.00E-21<br>5.00E-21<br>6.00E-16<br>5.00E-13 | symbB.v1.2.028953.t1                                                 | 0.00                             | SymbC1.scaffold11.271<br>SymbC1.scaffold4.799<br>SymbC1.scaffold9.107<br>SymbC1.scaffold2.2020<br>SymbC1.scaffold21.53<br>SymbC1.scaffold7772.3<br>SymbC1.scaffold685.28<br>SymbC1.scaffold7.65<br>SymbC1.scaffold24348.2<br>SymbC1.scaffold22405.1                                                                                                                                                                                                                                                                                | 8.00E-39<br>2.00E-38<br>1.00E-35<br>4.00E-35<br>5.00E-34<br>9.00E-31<br>3.00E-30<br>6.00E-25<br>1.00E-18<br>7.00E-07                                                                                                                                 | SymbF.scaffold11.23<br>SymbF.scaffold3925.3 | 2.00E-34<br>2.00E-23 |
| UniProt ID: B2IXG5<br>Gene: <i>trpE</i><br>Gene ID in <i>N. punctiforme</i> : Npun_R1266                 | Smic1909                                                                  | 9.00E-42                                                             | symbB.v1.2.004052.t1<br>symbB.v1.2.037466.t1                         | 0.00<br>6.00E-20                 | SymbC1.scaffold3197.1<br>SymbC1.scaffold22.189<br>SymbC1.scaffold5.278<br>SymbC1.scaffold21.403<br>SymbC1.scaffold13906.1<br>SymbC1.scaffold17352.1<br>SymbC1.scaffold15.265<br>SymbC1.scaffold70.43<br>SymbC1.scaffold2.1336<br>SymbC1.scaffold23.168<br>SymbC1.scaffold70.35<br>SymbC1.scaffold482.52<br>SymbC1.scaffold1.483<br>SymbC1.scaffold80.158<br>SymbC1.scaffold2.1535<br>SymbC1.scaffold9.600<br>SymbC1.scaffold1.688<br>SymbC1.scaffold685.10<br>SymbC1.scaffold3095.7<br>SymbC1.scaffold4.342<br>SymbC1.scaffold7.63 | 0.00<br>1.00E-53<br>1.00E-53<br>3.00E-49<br>8.00E-39<br>1.00E-33<br>4.00E-33<br>1.00E-30<br>1.00E-27<br>3.00E-23<br>8.00E-21<br>1.00E-19<br>6.00E-16<br>9.00E-16<br>4.00E-11<br>2.00E-09<br>3.00E-08<br>1.00E-07<br>1.00E-07<br>3.00E-06<br>6.00E-06 | SymbF.scaffold11.23<br>SymbF.scaffold3925.3 | 2.00E-34<br>2.00E-23 |
| UniProt ID: B2IXG4<br>Gene: <i>trpC</i><br>Gene ID in <i>N. punctiforme</i> : Npun_R1265                 | Smic7823                                                                  | 3.00E-33                                                             | symbB.v1.2.022171.t1                                                 | 2.00E-34                         | SymbC1.scaffold17429.1<br>SymbC1.scaffold70.43<br>SymbC1.scaffold80.158<br>SymbC1.scaffold11.333<br>SymbC1.scaffold21.296<br>SymbC1.scaffold17905.1<br>SymbC1.scaffold21766.1<br>SymbC1.scaffold2493.1                                                                                                                                                                                                                                                                                                                             | 3.00E-59<br>1.00E-55<br>1.00E-55<br>5.00E-55<br>3.00E-52<br>4.00E-46<br>6.00E-46<br>6.00E-23                                                                                                                                                         | SymbF.scaffold3240.10                       | 1.00E-09             |
| UniProt ID: B2IXG3<br>Gene: <i>trpA</i><br>Gene ID in <i>N. punctiforme</i> : Npun_R1264                 | Smic3643                                                                  | 4.00E-16                                                             | symbB.v1.2.000731.t1                                                 | 2.00E-41                         | SymbC1.scaffold5.1067<br>SymbC1.scaffold19.272<br>SymbC1.scaffold29630.1<br>SymbC1.scaffold1995.42<br>SymbC1.scaffold4.230<br>SymbC1.scaffold219.88<br>SymbC1.scaffold7.82<br>SymbC1.scaffold27503.1                                                                                                                                                                                                                                                                                                                               | 2.00E-60<br>1.00E-56<br>6.00E-53<br>6.00E-44<br>1.00E-43<br>3.00E-36<br>6.00E-35<br>1.00E-24                                                                                                                                                         | SymbF.scaffold3240.10                       | 5.00E-21             |

| Protein                                                                                  | <i>S. microadriaticum</i> (A) |                      | <i>S. minutum</i> (B)                        |                       | <i>S. goreau</i> (C)                                                                                                                                                                                                                                                                                                                                                              |                                                                                                                                                                                           | <i>S. kawagutii</i> (F)                                               |                                    |
|------------------------------------------------------------------------------------------|-------------------------------|----------------------|----------------------------------------------|-----------------------|-----------------------------------------------------------------------------------------------------------------------------------------------------------------------------------------------------------------------------------------------------------------------------------------------------------------------------------------------------------------------------------|-------------------------------------------------------------------------------------------------------------------------------------------------------------------------------------------|-----------------------------------------------------------------------|------------------------------------|
|                                                                                          | Hit(s)                        | E-value              | Hit(s)                                       | E-value               | Hit(s)                                                                                                                                                                                                                                                                                                                                                                            | E-value                                                                                                                                                                                   | Hit(s)                                                                | E-value                            |
| UniProt ID: B2IXG2<br>Gene: <i>tyrP</i><br>Gene ID in <i>N. punctiforme</i> : Npun_R1263 | Smic7316                      | 2.00E-09             | No hits                                      | N/A                   | No hits                                                                                                                                                                                                                                                                                                                                                                           | N/A                                                                                                                                                                                       | No hits                                                               | N/A                                |
| UniProt ID: B2IXG1<br>Gene: <i>trpB</i><br>Gene ID in <i>N. punctiforme</i> : Npun_R1262 | Smic36430<br>Smic14060        | 4.00E-37<br>1.00E-30 | symbB.v1.2.000731.t1<br>symbB.v1.2.014164.t1 | 1.00E-154<br>2.00E-32 | SymbC1.scaffold1.724<br>SymbC1.scaffold1995.42<br>SymbC1.scaffold4.230<br>SymbC1.scaffold7.82<br>SymbC1.scaffold219.88<br>SymbC1.scaffold5.1067<br>SymbC1.scaffold9.195<br>SymbC1.scaffold29611.1<br>SymbC1.scaffold3205.1<br>SymbC1.scaffold38296.1<br>SymbC1.scaffold2284.2<br>SymbC1.scaffold29630.1<br>SymbC1.scaffold540.17<br>SymbC1.scaffold7.661<br>SymbC1.scaffold2815.2 | 4.00E-172<br>4.00E-169<br>1.00E-166<br>7.00E-155<br>2.00E-147<br>3.00E-147<br>1.00E-143<br>3.00E-129<br>4.00E-111<br>2.00E-77<br>4.00E-33<br>9.00E-33<br>6.00E-30<br>5.00E-26<br>1.00E-20 | SymbF.scaffold11.353<br>SymbF.scaffold939.1<br>SymbF.scaffold15790.1  | 6.00E-172<br>3.00E-154<br>2.00E-51 |
| UniProt ID: B2IXG0<br>Gene: <i>trpD</i><br>Gene ID in <i>N. punctiforme</i> : Npun_R1261 | Smic34102                     | 2.00E-47             | symbB.v1.2.012378.t1                         | 5.00E-46              | SymbC1.scaffold7.227<br>SymbC1.scaffold21.296<br>SymbC1.scaffold80.158<br>SymbC1.scaffold70.43                                                                                                                                                                                                                                                                                    | 2.00E-58<br>7.00E-52<br>8.00E-49<br>6.00E-43                                                                                                                                              | SymbF.scaffold3240.10                                                 | 3.00E-59                           |
| UniProt ID: B2IXF9<br>Gene: <i>aroG</i><br>Gene ID in <i>N. punctiforme</i> : Npun_R1260 | No hits                       | N/A                  | No hits                                      | N/A                   | SymbC1.scaffold11.361<br>SymbC1.scaffold5.979<br>SymbC1.scaffold17.172<br>SymbC1.scaffold2.1765<br>SymbC1.scaffold1.197<br>SymbC1.scaffold8922.3<br>SymbC1.scaffold70.31<br>SymbC1.scaffold18.265<br>SymbC1.scaffold4.307<br>SymbC1.scaffold216.60                                                                                                                                | 3.00E-90<br>3.00E-87<br>3.00E-81<br>2.00E-78<br>2.00E-26<br>1.00E-24<br>8.00E-21<br>1.00E-20<br>2.00E-18<br>7.00E-14                                                                      | SymbF.scaffold3240.10<br>SymbF.scaffold690.22<br>SymbF.scaffold5147.8 | 2.00E-82<br>9.00E-37<br>3.00E-13   |
| UniProt ID: B2IXF8<br>Gene unknown<br>Gene ID in <i>N. punctiforme</i> : Npun_R1259      | No hits                       | N/A                  | No hits                                      | N/A                   | No hits                                                                                                                                                                                                                                                                                                                                                                           | N/A                                                                                                                                                                                       | No hits                                                               | N/A                                |

**Supplementary Table 17.** Statistics of preliminary genome assemblies.

|                               | <i>Symbiodinium goreau</i> SCF055-01<br>(clade C, type C1) |                              |               | <i>Symbiodinium kawagutii</i> CS-156<br>(=CCMP2468, clade F) |                              |               |
|-------------------------------|------------------------------------------------------------|------------------------------|---------------|--------------------------------------------------------------|------------------------------|---------------|
|                               | ALLPATHS-LG                                                | CLC<br>Genomics<br>Workbench | SPAdes*       | ALLPATHS-LG                                                  | CLC<br>Genomics<br>Workbench | SPAdes        |
| %G+C                          | 45.40                                                      | 45.36                        | 44.53         | 45.40                                                        | 45.91                        | 45.74         |
| Total number of scaffolds     | 28,243                                                     | 41,412                       | 1,906,899     | 6,305                                                        | 85,340                       | 501,627       |
| Total assembled bases (bp)    | 1,011,466,282                                              | 1,060,349,155                | 1,452,039,755 | 913,085,015                                                  | 1,106,975,017                | 1,300,991,596 |
| N50 length of scaffolds (bp)  | 113,414                                                    | 101,436                      | 42,733        | 458,350                                                      | 272,097                      | 243,842       |
| Maximum scaffold length (bp)  | 8,454,000                                                  | 8,337,350                    | 8,340,000     | 5,432,874                                                    | 5,507,473                    | 6,118,942     |
| Total number of contigs       | 110,037                                                    | 270,205                      | 2,185,232     | 53,712                                                       | 182,229                      | 615,029       |
| N50 length of contigs (bp)    | 15,777                                                     | 6,805                        | 4,252         | 31,411                                                       | 35,785                       | 40,446        |
| Maximum contig length (bp)    | 2,989,000                                                  | 3,449,000                    | 1,859,000     | 2,124,640                                                    | 1,933,067                    | 1,245,445     |
| Number of scaffolds > 50 Kb   | 6,075                                                      | 6,206                        | 5,830         | 2,694                                                        | 4,264                        | 4,100         |
| % genome in scaffolds > 50 Kb | 78.05                                                      | 73.64                        | 46.86         | 97.32                                                        | 87.82                        | 76.06         |
| % gap                         | 21.00                                                      | 12.89                        | 8.81          | 7.83                                                         | 14.63                        | 19.80         |
| % CEGMA genes (eukaryote)     | 75.11                                                      | 76.20                        | 85.37         | 74.45                                                        | 83.19                        | 74.89         |
| % BUSCO genes (eukaryote)     | 37.62                                                      | 37.62                        | 38.61         | 38.61                                                        | 46.86                        | 40.26         |

\*: This SPAdes assembly is based on *k*-mer size 111 only, thus is more fragmented than the others.

**Supplementary Table 18.** Proteins used as evidence in evidence-based gene prediction.

| <b>Source</b>                                            | <b>Number of sequences</b> |
|----------------------------------------------------------|----------------------------|
| RefSeq release 78 (complete)                             | 49,301,516                 |
| <i>Symbiodinium minutum</i> (Shoguchi et al. 2013)       | 47,014                     |
| <i>Symbiodinium kawagutii</i> (Lin et al. 2015)          | 36,850                     |
| <i>Symbiodinium microadriaticum</i> (Aranda et al. 2016) | 49,109                     |
| <i>Symbiodinium kawagutii</i> MMETSP0132                 | 12,602                     |
| <i>Symbiodinium</i> sp. CCMP421; MMETSP1110              | 72,821                     |
| <i>Symbiodinium</i> sp. CCMP2430; MMETSP1115             | 44,145                     |
| <i>Symbiodinium</i> sp. Mp.; MMETSP1122                  | 44,283                     |
| <i>Symbiodinium</i> sp. C1; MMETSP1367                   | 43,592                     |
| <i>Symbiodinium</i> sp. C15; MMETSP1370                  | 35,777                     |
| <i>Symbiodinium</i> sp. D1A; MMETSP1377                  | 45,153                     |
| <b>Total number of sequences</b>                         | <b>49,732,862</b>          |

## Supplementary Note 1

### Nuclear genomes of *S. goreau* and *S. kawagutii*

The G+C contents of our assembled genomes of *S. goreau* (43.8%) and *S. kawagutii* (45.6%) are comparable to the earlier *S. kawagutii* assembly (44.0%)<sup>1</sup> and to *S. minutum* (43.6%)<sup>2</sup>, and lower than for *S. microadriaticum* (50.5%)<sup>3</sup>. Supplementary Fig. 1A shows the extent of mapped sequence reads from *S. goreau* and from *S. kawagutii* to each assembled *Symbiodinium* genome. Most reads (>78%) mapped to the corresponding assembly. Only about 16.5% of reads from *S. goreau* mapped to the two *S. kawagutii* genomes, and conversely 17.6% of *S. kawagutii* reads to *S. goreau*. This is in contrast to 4.1% of *S. goreau* reads and 10.3% of *S. kawagutii* reads that mapped to *S. microadriaticum*. These results indicate a high extent of dissimilarity among *Symbiodinium* genomes, greatest between representatives of Clades C and A, and least (although not by far) between C and F.

We adopted a comprehensive *ab initio* approach for predicting genes, combining both evidence-based and unsupervised methods (Methods). Average gene lengths (7671 bp in *S. goreau*, 6646 bp in *S. kawagutii*) are intermediate between the shortest (3788 bp in the earlier *S. kawagutii* genome)<sup>1</sup> and longest average (12,898 bp in *S. microadriaticum*)<sup>3</sup>. In addition, we observed similar codon usage (Supplementary Fig. 4) and amino acid profiles (Supplementary Fig. 5) among the genes of *S. goreau*, *S. kawagutii* and *S. microadriaticum*; the latter shows a slight bias towards high-G+C codons. *S. minutum*<sup>2</sup> shows a distinctive codon usage profile vis-à-vis the others, with substantially higher contents of arginine, serine and tryptophan in predicted protein sequences (Supplementary Fig. 5).

Proportions of canonical (GC) and non-canonical 5'-donor splice sites (GA, GT) in *Symbiodinium* genomes are shown in Supplementary Table 9. These splice sites occur in similar proportion in the genomes of *S. goreau* and *S. kawagutii*, with GA << GC < GT (e.g. 19.5% GA, 36.1% GC and 44.4% GT in *S. kawagutii*); a similar pattern was observed in *S. minutum*<sup>2</sup>, whereas in *S. microadriaticum*<sup>3</sup> the canonical GC is more prominent (21.9% GA, 52.1% GC and 26.0% GT). Non-canonical 5'-donor sites were not explicitly considered in the gene-prediction process for the earlier *S. kawagutii* genome, although a dominance of GT sites (65.6%) was observed. In all *Symbiodinium* genomes, a non-canonical G usually immediately follows the acceptor splice site (Supplementary Table 9 and Supplementary Fig. 6). Thus *Symbiodinium* of Clades C and F use donor splice sites similarly to Clade B, but



different than Clade A; this is likely related to the higher G+C content in the *S. microadriaticum* genome (50.51%) than in the others (43.46-45.59%).

### **Plastid genomes of *S. goreau* and *S. kawagutii***

Plastid genomes of dinoflagellates occur as minicircles each with one or more protein-coding genes, plus a non-coding region that contains a highly conserved core<sup>4,6</sup>. We identified putative minicircle sequences with plastid-encoded genes in each of our two genomes: nine sequences encoding 14 genes in *S. goreau* (Supplementary Table 4), and 13 sequences encoding 13 genes in *S. kawagutii* (Supplementary Table 5). A highly conserved core region was identified, of 79 bp and 41 bp for *S. goreau* and *S. kawagutii* respectively (Supplementary Table 7). We also identified putative “empty” minicircles (two in *S. goreau*, one in *S. kawagutii*) that do not encode any gene. Empty minicircles have been described in other dinoflagellates, but were not seen in *Symbiodinium* type C3<sup>4</sup> or *S. minutum*<sup>7</sup>. Plastid-encoded *psbI*, previously reported in *S. minutum* but not in *Symbiodinium* type C3, was found in minicircle-like sequences in both *S. goreau* and *S. kawagutii*; we did not find direct evidence of circularisation in these sequences, but a core region is present in the *psbI*-encoding sequence from *S. goreau*. Our results demonstrate that “empty” minicircles and plastid-encoded *psbI* occur in *Symbiodinium*; full-length minicircle sequences in *S. goreau* and *S. kawagutii* remain to be validated.

Specifically from the *S. goreau* ALLPATHS-LG assembly we recovered eight scaffolds containing all 13 known plastid-encoded genes (Supplementary Table 4) described previously for *Symbiodinium* type C3, as well as a scaffold containing the *psbI* gene described previously in *S. minutum*. Some of the genes were recovered only in part, and none of the scaffolds shows clear evidence of circularisation. Three of the gene-coding scaffolds (SC1\_Plastid\_1, SC1\_Plastid\_2 and SC1\_Plastid\_3) displayed characteristics that have not been described before in dinoflagellate minicircles. These scaffolds are longer than minicircles observed in other dinoflagellates, and contain multiple core regions. They also encode multiple genes, some of which are fragmentary. Although minicircles with two genes have been observed in other dinoflagellates, studies in *Symbiodinium* type C3 and *S. minutum* have not recovered any such structures<sup>4,7</sup>.

All plastid genes except *psaA*, 16S rRNA and *psaB* were recovered in *S. goreau*. The 16S rRNA is fragmented in *Symbiodinium*; we recovered three partial fragments encoded on

SC1\_Plastid\_3. Only 48% (973/2022 bp) of the *psaA* gene, representing the end of the sequence, was recovered in a single fragment on SC1\_Plastid\_1. One full-length and one partial (12%; 128/1029 bp) copy of the *psbA* gene are present in SC1\_Plastid\_2. The *psaB* gene is encoded over two fragments (representing regions of 50-1319 nt and 1502-2082 nt) that together comprise 89% (1851/2082 bp) of the length of the *psaB* described in type C3. The two fragments of the *psaB* gene are encoded sequentially, separated on the scaffold by 3 bp; the length of the missing sequence between the two fragments is 182 bp. Studies in other dinoflagellates suggest that genes such as *psaA* have undergone internal deletions as a way of reducing size to fit on a minicircle<sup>4,5</sup>, and such a process could also have impacted the *psaB* gene described in type C3. A 79-bp core (Supplementary Table 7) was identified in *S. goreau* and recovered in all scaffolds found to encode plastid genes. SC1\_Plastid\_8 contains a partial core region that is encoded at the beginning of the sequence and SC1\_Plastid\_9 contained a full length core region with two mismatches. The core region was used to isolate SC1\_Plastid\_10 that had not been previously identified as being of plastid origin. It is not circular, and a comparison with the NCBI NR database found no similarity with any known genes. The identity of this scaffold as a minicircle, and whether it is an “empty” minicircle, remain to be validated.

From the *S. kawagutii* data we recovered 13 scaffolds that contain 13 of the known plastid-encoded genes (Supplementary Table 5), with only *psbE* not recovered. Five of the scaffolds (SF\_Plastid\_1, SF\_Plastid\_2, SF\_Plastid\_3, SF\_Plastid\_4 and SF\_Plastid\_5) are outside the 2-4 Kbp size range observed in other dinoflagellates<sup>4</sup>. The 16S rRNA was found as two partial fragments encoded on two scaffolds, consistent with our current understanding of the 16S rRNA gene structure in *Symbiodinium*. The *psaB*, *atpB*, *psaA*, *psbC* and *atpA* genes were recovered as multi-copy fragments encoded on the same scaffold. For example, the *atpA* gene in SF\_Plastid\_5 is present in two nearly complete copies, whereas in SF\_Plastid\_1 six partial fragments of the *psaB* gene were recovered. Gene structures of this nature have not been observed in any other dinoflagellate.

Three gene-encoding scaffolds (SF\_Plastid\_3, SF\_Plastid\_5 and SF\_Plastid\_12) were found to also be circular in *S. kawagutii*. SF\_Plastid\_3 has a 139-bp overlap (100% identity) at each end of the sequence, SF\_Plastid\_5 has a 1874-bp overlap (98% identity) and SF\_Plastid\_12 a 45-bp overlap (100% identity). A 41-bp core was identified in *S. kawagutii* and was recovered in only six of the plastid gene-encoding scaffolds. Two previously

unidentified scaffolds (SF\_Plastid\_14 and SF\_Plastid\_15) were found to contain the *S. kawagutii* core region, with SF\_Plastid\_14 also found to be circular. Both scaffolds were checked against the NCBI nr database and show no similarity with any known encoded genes. Circularisation of SF\_Plastid\_14 occurs between the two encoded core regions that are positioned exactly at the start and end of the scaffold. The positioning of the core regions along the scaffold may be an artefact of assembly and so the identity of the scaffold, potentially as an “empty” minicircle, remains to be investigated.

In *S. goreau* and *S. kawagutii*, some scaffolds identified as being of plastid origin show traits that have not been observed in other dinoflagellates. In both *S. goreau* and *S. kawagutii* there are scaffolds which exceed the size expected of a minicircle (i.e. 1.3-3.0 Kbp<sup>4,7</sup>), and encode gene structures that vary significantly from what has been observed for plastids of other dinoflagellates. Duplications within the scaffolds (encompassing genes, core regions and non-coding regions) and scaffolds composed of multiple minicircles could for instance be assembly artifacts. The data generation and assembly strategy adopted in this study was designed to recover nuclear rather than organellar genomes. These data serve as the first analysis platform for the organellar genomes of *S. goreau* and *S. kawagutii*, and can be extended using a PCR sequencing strategy based on targeted primer design.

The G+C contents of the coding and non-coding regions for the plastid sequences in *S. goreau* and *S. kawagutii* are summarised in Supplementary Table 6. In the plastid minicircles of *Symbiodinium* type C3, G+C content within the coding regions (36.03%) is lower than that within the non-coding regions (48.22%)<sup>4</sup>. The gene-coding regions identified in our *S. goreau* data have G+C content (36.80%) close to that published for type C3 (36.03%). The G+C content of the non-coding regions (45.64%), however, is three percentage points lower than the published data (48.22%), possibly due to the increased length of identified non-coding sequences (18,051 bp in *S. goreau* and 11,475 bp in type C3). Our *S. kawagutii* data have G+C content in their coding (35.46%) and non-coding regions (42.56%) below that observed in type C3 and in our *S. goreau* data. For *S. kawagutii* both the length of the recovered coding and non-coding sequence are much higher than that of type C3. Many of the scaffolds encode duplicate regions of genes, increasing the total length of the coding sequence recovered beyond what is observed for type C3.

## Mitochondrial genomes of *S. goreau* and *S. kawagutii*

We identified one scaffold from *S. goreau*, and two from *S. kawagutii*, that contain genes known to be encoded in the mitochondrial genome of dinoflagellates. For *S. goreau*, SC1\_Mitochondria\_1 (length 55,144 bp) was found to contain the *cox3*, *cox1* and *cob* genes, with a fragment of the LSU rRNA between the *cox3* and *cox1* genes. For *S. kawagutii* SF\_Mitochondria\_1 (length 62,663 bp) the *cox3*, *cox1* and *cob* genes were all recovered, and the LSU rRNA was found between the *cox3* and *cox1* genes. SF\_Mitochondria\_2 (length 35,965 bp) from *S. kawagutii* contains only the *cox1* gene. This configuration of *cox3*-LSU rRNA-*cox1*-*cob* is well-characterised in the apicomplexa *Plasmodium falciparum*<sup>8</sup> and has been observed in dinoflagellates<sup>9,10</sup>. The size of the mitochondrial genome in dinoflagellates has not yet been determined, but previous studies recovered a genome sequence of up to 42 Kbp<sup>9</sup>. SC1\_Mitochondria\_1 from *S. goreau* and SF\_Mitochondria\_1 from *S. kawagutii* both display characteristics of dinoflagellate mitochondrial genomes but are 55,144 and 62,663 bp in length respectively. Our findings suggest that the mitochondrial genome of *Symbiodinium* is considerably larger than what has been described previously at 42 Kbp<sup>9</sup> in dinoflagellates.

## DMSP and DMS

Dimethylsulphoniopropionate (DMSP) serves as an osmolyte and antioxidant for both the alga and the coral, as a nutrient for associated bacteria<sup>11</sup> and as a signal in maintaining the complex interactions among holobiont partners<sup>12</sup>. In coral-associated *Symbiodinium*<sup>13</sup> and other biological systems, DMSP lyase converts DMSP into dimethylsulphide (DMS). DMS, in turn, is the major input of biogenic sulphur into the marine boundary layer<sup>14</sup> and can contribute to sulphate aerosols that nucleate cloud condensation, thereby lowering global temperatures<sup>15</sup>. DMSP concentrations are positively correlated with the thermal tolerance of *Symbiodinium*, and with bleaching tolerance of the coral *Acropora millepora*<sup>16</sup>.

Investigating the salinity-induced production of DMSP, Lyon et al.<sup>17</sup> identified candidate enzymes of DMSP biosynthesis in the sea-ice diatom *Fragilariopsis cylindrus*. DMS production correlates with expression of *Alma1* (encoding DMSP lyase) in the bloom-forming cryptophyte *Emiliana huxleyi*<sup>18,19</sup>. Here we used BLASTP to search these sequences against our *Symbiodinium* gene models. We found three putative DMSP lyase genes in *S. goreau*, and four in *S. kawagutii* (Supplementary Data 3 and 4); the predicted proteins show significant sequence similarity ( $E < 10^{-100}$  and nearly full-length alignment) to *Alma* genes in *E. huxleyi* and the *Alma1* protein described in *Symbiodinium* Clade D, indicative of capacity

to degrade DMSP into DMS. Since Raina et al.<sup>20</sup> showed that corals can also produce DMSP, we further examined whether coral could degrade DMSP by searching for ALMA orthologs. We find that *A. digitifera* has the molecular machinery that potentially encodes Alma1 and produce DMS. Since both coral and symbiotic alga have the genetic capacity to produce DMSP and DMS, we encourage future studies to confirm whether DMS is produced by corals and explore the mechanisms that regulate the dynamics of DMS(P) production and its influence on the complex interplay among corals, *Symbiodinium* spp. and other symbiotic microbes, especially those using DMSP as a source of sulphur.

### Evolution of gene families

The results of gene gain and gene loss along *Symbiodinium* lineages with respect to the outgroup *P. glacialis* are shown in Supplementary Fig. 10. Overall we observed a higher number of gene losses in the lineage leading to *S. kawagutii* (Clade F) than in that leading to *S. goreau* (Clade C), i.e. 3122 versus 1375 genes respectively among protein sets generated at  $I = 1.0$  (Supplementary Fig. 10A). More gene losses are inferred when the clustering is more granular, e.g. 6314 versus 3482 genes at  $I = 2.0$  (Supplementary Fig. 10C). In comparison, the lineages leading to *S. minutum* (Clade B) and *S. microadriaticum* (Clade A) appear to have gained more genes (186 and 218 genes respectively) than those leading to *S. kawagutii* and *S. goreau* (97 and 69 respectively) ( $I = 2.0$ ; Supplementary Fig. 10C). The greater inferred number of gene loss in the lineages leading to Clades C and F, and of gene gain in lineages leading to Clades A and B, while interesting, remain to be validated with more-complete genome data from *Symbiodinium*.

### Supplementary References

1. Lin, S. et al. The *Symbiodinium kawagutii* genome illuminates dinoflagellate gene expression and coral symbiosis. *Science* **350**, 691-694 (2015).
2. Shoguchi, E. et al. Draft assembly of the *Symbiodinium minutum* nuclear genome reveals dinoflagellate gene structure. *Curr. Biol.* **23**, 1399-1408 (2013).
3. Aranda, M. et al. Genomes of coral dinoflagellate symbionts highlight evolutionary adaptations conducive to a symbiotic lifestyle. *Sci. Rep.* **6**, 39734 (2016).
4. Barbrook, A.C., Voolstra, C.R. & Howe, C.J. The chloroplast genome of a *Symbiodinium* sp. Clade C3 isolate. *Protist* **165**, 1-13 (2014).
5. Howe, C.J., Nisbet, R.E.R. & Barbrook, A.C. The remarkable chloroplast genome of dinoflagellates. *J. Exp. Bot.* **59**, 1035-1045 (2008).

6. Zhang, Z., Green, B.R. & Cavalier-Smith, T. Single gene circles in dinoflagellate chloroplast genomes. *Nature* **400**, 155-159 (1999).
7. Mungpakdee, S. et al. Massive gene transfer and extensive RNA editing of a symbiotic dinoflagellate plastid genome. *Genome Biol. Evol.* **6**, 1408-1422 (2014).
8. Feagin, J.E. The 6-kb element of *Plasmodium falciparum* encodes mitochondrial cytochrome genes. *Mol. Biochem. Parasitol.* **52**, 145-148 (1992).
9. Jackson, C.J. et al. Broad genomic and transcriptional analysis reveals a highly derived genome in dinoflagellate mitochondria. *BMC Biol.* **5**, 41 (2007).
10. Nash, E.A., Nisbet, R.E.R., Barbrook, A.C. & Howe, C.J. Dinoflagellates: a mitochondrial genome all at sea. *Trends Genet.* **24**, 328-335 (2008).
11. Teplitski, M., Krediet, C.J., Meyer, J.L. & Ritchie, K.B. Microbial interactions on coral surfaces and within the coral holobiont. In *The Cnidaria, Past, Present and Future: The World of Medusa and Her Sisters* (eds. Goffredo, S. & Dubinsky, Z.) 331-346 (Springer International Publishing, Cham, Switzerland, 2016).
12. Raina, J.B., Dinsdale, E.A., Willis, B.L. & Bourne, D.G. Do the organic sulfur compounds DMSP and DMS drive coral microbial associations? *Trends Microbiol.* **18**, 101-108 (2010).
13. Yost, D.M. & Mitchelmore, C.L. Dimethylsulfoniopropionate (DMSP) lyase activity in different strains of the symbiotic alga *Symbiodinium microadriaticum*. *Mar. Ecol. Prog. Ser.* **386**, 61-70 (2009).
14. Liss, P.S., Hatton, A.D., Malin, G., Nightingale, P.D. & Turner, S.M. Marine sulphur emissions. *Phil. Trans. R. Soc. B* **352**, 159-169 (1997).
15. Charlson, R.J., Lovelock, J.E., Andreae, M.O. & Warren, S.G. Oceanic phytoplankton, atmospheric sulphur, cloud albedo and climate. *Nature* **326**, 655-661 (1987).
16. Jones, G.B. & King, S. Dimethylsulphoniopropionate (DMSP) as an indicator of bleaching tolerance in scleractinian corals. *J. Mar. Sci. Eng.* **3**, 444-465 (2015).
17. Lyon, B.R., Lee, P.A., Bennett, J.M., DiTullio, G.R. & Janech, M.G. Proteomic analysis of a sea-ice diatom: salinity acclimation provides new insight into the dimethylsulfoniopropionate production pathway. *Plant Physiol.* **157**, 1926-1941 (2011).
18. Alcolombri, U. et al. Identification of the algal dimethyl sulfide-releasing enzyme: a missing link in the marine sulfur cycle. *Science* **348**, 1466-1469 (2015).
19. Alcolombri, U., Lei, L., Meltzer, D., Vardi, A. & Tawfik, D.S. Assigning the algal source of dimethylsulfide using a selective lyase inhibitor. *ACS Chem. Biol.* **12**, 41-46 (2017).
20. Raina, J.B. et al. DMSP biosynthesis by an animal and its role in coral thermal stress response. *Nature* **502**, 677-680 (2013).
